# Supplementary material for: Gene expression profiling of resistant and susceptible soybean lines infected with soybean cyst nematode
Source: Springer Nature journal article supplement (doi:10.1007/s00122-011-1659-8), 2011-07-28
Supplement: MOESM3 [file 122_2011_1659_MOESM3_ESM.pdf]

**Supplemental Table 3.** Functional classification of probe sets showing significant increased transcript levels that were unique to the susceptible line in soybean cyst nematode-infected root tissue as compared to mock control.

| Probe ID              | p-value     | Fold Change | G. max GenBankID | TIGR (PlantTA) Description                                                                             | Arabidopsis ID | Arabidopsis Description                                                                                                                                                                                                                        | Functional Category    |
|-----------------------|-------------|-------------|------------------|--------------------------------------------------------------------------------------------------------|----------------|------------------------------------------------------------------------------------------------------------------------------------------------------------------------------------------------------------------------------------------------|------------------------|
| Gma.12040.4.A1_at     | 0.0169113   | 2.23049     | CA785568         | Nucleolar protein-like [Oryza sativa (japonica cultivar-group)]                                        | AT4G39870      | similar to unknown protein [Arabidopsis thaliana] (TAIR:AT2G05590.2); similar to Os06g0221100 [Oryza sativa (japonica cultivar-group)] (GB:NP001057175.1); similar to Os02g0754000 [Oryza sativa (japonica cultivar-group)] (GB:NP001048151.1) | Cell Growth & Division |
| Gma.12710.1.A1_at     | 0.0021542   | 2.12366     | CD395311         | Replication factor A-like protein [Arabidopsis thaliana (Mouse-ear cress)]                             | AT5G61000      | replication protein, putative                                                                                                                                                                                                                  | Cell Growth & Division |
| Gma.13469.1.A1_at     | 0.00930252  | 2.09691     | CD398557         | Chromosome condensation protein [Arabidopsis thaliana (Mouse-ear cress)]                               | AT5G48600      | ATSMC3 (Arabidopsis thaliana structural maintenance of chromosome 3); ATP binding                                                                                                                                                              | Cell Growth & Division |
| Gma.14125.1.A1_at     | 0.00459589  | 4.36517     | CD416082         | Homolog of Homo sapiens "Striatin 3 (Cell-cycle autoantigen SG2NA) (S/G2 antigen). [Takifugu rubripes] | 0              | 0                                                                                                                                                                                                                                              | Cell Growth & Division |
| Gma.4218.2.S1_at      | 0.000139137 | 2.14983     | BE805868         | Targeting for Xklp2 [Medicago truncatula (Barrel medic)]                                               | AT3G23090      | similar to WDL1 (WVD2-LIKE 1) [Arabidopsis thaliana] (TAIR:AT3G04630.3); similar to seed specific protein Bn15D14A [Brassica napus] (GB:AAP37969.1); contains InterPro domain Targeting for Xklp2; (InterPro:IPR009675)                        | Cell Growth & Division |
| Gma.5155.1.A1_at      | 0.000147095 | 2.07847     | BI971134         | Methyladenine glycosylase [Medicago truncatula (Barrel medic)]                                         | AT3G12710      | methyladenine glycosylase family protein                                                                                                                                                                                                       | Cell Growth & Division |
| Gma.5911.1.S1_at      | 1.03629E-05 | 2.01295     | AW349281         | Mitotic spindle checkpoint protein MAD2 [Arabidopsis thaliana (Mouse-ear cress)]                       | AT3G25980      | mitotic spindle checkpoint protein, putative (MAD2)                                                                                                                                                                                            | Cell Growth & Division |
| GmaAffx.12370.1.S1_at | 0.000247132 | 2.48065     | BE059411         | Microtubule-associated protein-like [Oryza sativa (japonica cultivar-group)]                           | AT5G62250      | microtubule associated protein (MAP65/ASE1) family protein                                                                                                                                                                                     | Cell Growth & Division |
| GmaAffx.23381.1.S1_at | 0.00196154  | 2.20962     | BI973984         | Replication protein A1 [Arabidopsis thaliana (Mouse-ear cress)]                                        | AT5G08020      | replication protein, putative                                                                                                                                                                                                                  | Cell Growth & Division |
| GmaAffx.29662.1.S1_at | 0.00138673  | 2.07966     | CD415526         | DNA-directed RNA polymerase II subunit-like protein [Arabidopsis thaliana (Mouse-ear cress)]           | 0              | 0                                                                                                                                                                                                                                              | Cell Growth & Division |
| GmaAffx.39169.1.S1_at | 0.00624022  | 2.021       | AW350332         | Cellular retinaldehyde-binding/triple function, C-terminal [Medicago truncatula (Barrel medic)]        | AT2G33560      | spindle checkpoint protein-related                                                                                                                                                                                                             | Cell Growth & Division |
| GmaAffx.69489.1.S1_at | 0.0047083   | 2.59824     | BG238202         | Cyclin delta-1 [Arabidopsis thaliana (Mouse-ear cress)]                                                | AT1G70210      | CYCD1;1 (CYCLIN D1;1); cyclin-dependent protein kinase regulator                                                                                                                                                                               | Cell Growth & Division |
| GmaAffx.79262.1.S1_at | 0.00423359  | 2.16573     | CA801774         | Origin recognition complex 4 subunit [Arabidopsis thaliana (Mouse-ear cress)]                          | 0              | 0                                                                                                                                                                                                                                              | Cell Growth & Division |
| GmaAffx.81472.1.S1_at | 0.00218429  | 2.17974     | AW570625         | PREG regulatory protein-like [Arabidopsis thaliana (Mouse-ear cress)]                                  | AT2G44740      | CYCP4;1 (cyclin p4;1); cyclin-dependent protein kinase                                                                                                                                                                                         | Cell Growth & Division |

|                       |             |         |          |                                                                                                                     |           |                                                                                                                                                            |                        |
|-----------------------|-------------|---------|----------|---------------------------------------------------------------------------------------------------------------------|-----------|------------------------------------------------------------------------------------------------------------------------------------------------------------|------------------------|
| GmaAffx.82879.1.S1_at | 0.00676461  | 2.03124 | BM731508 | GIN5 complex, Psf1 component [Medicago truncatula (Barrel medic)]                                                   | AT1G80190 | similar to GIN5 complex, Psf1 component [Medicago truncatula] (GB:ABE94320.1); contains InterPro domain GIN5 complex, Psf1 component; (InterPro:IPR005339) | Cell Growth & Division |
| Gma.10795.1.S1_at     | 5.20863E-05 | 3.10956 | AI442845 | Glycoside hydrolase, family 16; Xyloglucan endo-transglycosylase, C-terminal [Medicago truncatula (Barrel medic)]   | AT2G36870 | xyloglucan:xyloglucosyl transferase, putative / xyloglucan endotransglycosylase, putative / endo-xyloglucan transferase, putative                          | Cell Structure         |
| Gma.10997.1.S1_at     | 3.97293E-05 | 2.05758 | CD396418 | F25I16.1 protein [Arabidopsis thaliana (Mouse-ear cress)]                                                           | AT1G18650 | glycosyl hydrolase family protein 17                                                                                                                       | Cell Structure         |
| Gma.11298.2.S1_at     | 6.39553E-07 | 2.81386 | CD415329 | Pectate lyase [Fragaria ananassa (Strawberry)]                                                                      | 0         | 0                                                                                                                                                          | Cell Structure         |
| Gma.1254.1.S1_at      | 0.00040179  | 2.11707 | CF921991 | Homolog of Homo sapiens "Histone 1, H2ai [Takifugu rubripes]                                                        | 0         | histone H4                                                                                                                                                 | Cell Structure         |
| Gma.13759.1.A1_at     | 0.002855    | 2.14069 | CD404860 | NA                                                                                                                  | AT5G34940 | glycosyl hydrolase family 79 N-terminal domain-containing protein                                                                                          | Cell Structure         |
| Gma.1458.1.S1_at      | 2.95776E-05 | 2.19014 | BI970708 | Pectinesterase, putative, 5' partial; 91413-90223 [Arabidopsis thaliana (Mouse-ear cress)]                          | AT1G76160 | SKS5 (SKU5 Similar 5); copper ion binding / oxidoreductase                                                                                                 | Cell Structure         |
| Gma.14802.1.S1_at     | 0.00215347  | 2.54259 | AW201116 | Emb[CAB70981.1 [Arabidopsis thaliana (Mouse-ear cress)]                                                             | AT3G54070 | ankyrin repeat family protein                                                                                                                              | Cell Structure         |
| Gma.16107.1.S1_at     | 6.87008E-05 | 2.12611 | CD405936 | Polygalacturonase-1 non-catalytic subunit beta precursor [Lycopersicon esculentum (Tomato)]                         | AT1G23760 | JP630; polygalacturonase                                                                                                                                   | Cell Structure         |
| Gma.16122.1.S1_at     | 3.99453E-05 | 2.13583 | CD413696 | Endo-1,4-beta-glucanase [Glycine max (Soybean)]                                                                     | AT4G02290 | glycosyl hydrolase family 9 protein                                                                                                                        | Cell Structure         |
| Gma.18013.1.A1_at     | 4.56956E-05 | 2.03044 | CD400520 | PREDICTED: similar to H3 histone, family 2 isoform 2 [Canis familiaris]                                             | AT5G65360 | histone H3                                                                                                                                                 | Cell Structure         |
| Gma.2224.1.S1_at      | 0.000087503 | 2.03541 | CD406086 | Tubulin beta-1 chain [Zea mays (Maize)]                                                                             | AT5G23860 | TUB8 (tubulin beta-8)                                                                                                                                      | Cell Structure         |
| Gma.2224.1.S1_s_at    | 0.000250639 | 2.0777  | CD406086 | Tubulin beta-1 chain [Zea mays (Maize)]                                                                             | AT5G23860 | TUB8 (tubulin beta-8)                                                                                                                                      | Cell Structure         |
| Gma.2307.1.S1_at      | 3.55433E-05 | 2.10591 | CA785639 | Putative PS60 [Oryza sativa (japonica cultivar-group)]                                                              | AT1G76160 | SKS5 (SKU5 Similar 5); copper ion binding / oxidoreductase                                                                                                 | Cell Structure         |
| Gma.3064.1.S1_at      | 0.000998553 | 2.0179  | CD403129 | Histone H3 [Triticum aestivum (Wheat)]                                                                              | AT5G65360 | histone H3                                                                                                                                                 | Cell Structure         |
| Gma.3594.2.S1_x_at    | 1.94473E-05 | 2.13815 | CD393884 | NA                                                                                                                  | AT4G37450 | AGP18 (Arabinogalactan protein 18)                                                                                                                         | Cell Structure         |
| Gma.361.1.S1_at       | 3.50561E-05 | 2.12466 | AW349280 | Xyloglucan endo-transglycosylase [Carica papaya (Papaya)]                                                           | AT2G36870 | xyloglucan:xyloglucosyl transferase, putative / xyloglucan endotransglycosylase, putative / endo-xyloglucan transferase, putative                          | Cell Structure         |
| Gma.4216.1.S1_a_at    | 0.000159209 | 2.04154 | BI970653 | Xyloglucan endotransglucosylase/hydrolase protein A precursor [Phaseolus angularis (Adzuki bean) (Vigna angularis)] | AT5G13870 | EXGT-A4 (ENDOXYLOGLUCAN TRANSFERASE A4); hydrolase, acting on glycosyl bonds                                                                               | Cell Structure         |
| Gma.4216.2.S1_s_at    | 5.65473E-07 | 2.30864 | CD405657 | Xyloglucan endotransglucosylase/hydrolase protein A precursor [Phaseolus angularis (Adzuki bean) (Vigna angularis)] | AT5G13870 | EXGT-A4 (ENDOXYLOGLUCAN TRANSFERASE A4); hydrolase, acting on glycosyl bonds                                                                               | Cell Structure         |

|                       |             |         |          |                                                                                                                  |           |                                                                                                                                   |                |
|-----------------------|-------------|---------|----------|------------------------------------------------------------------------------------------------------------------|-----------|-----------------------------------------------------------------------------------------------------------------------------------|----------------|
| Gma.4220.2.S1_at      | 0.000195773 | 2.19759 | AW164216 | Xyloglucan endotransglucosylase/hydrolase protein 9 precursor [Arabidopsis thaliana (Mouse-ear cress)]           | AT4G03210 | XTH9 (XYLOGLUCAN ENDOTRANSGLUCOSYLASE/HYDROLASE 9); hydrolase, acting on glycosyl bonds                                           | Cell Structure |
| Gma.4385.1.S1_at      | 0.000191899 | 2.63008 | BU762481 | Putative fasciclin-like arabinogalactan protein FLA2 [Trifolium pratense (Red clover)]                           | AT4G12730 | FLA2 (FLA2)                                                                                                                       | Cell Structure |
| Gma.4385.1.S1_s_at    | 1.84665E-08 | 2.16215 | BU762481 | Putative fasciclin-like arabinogalactan protein FLA2 [Trifolium pratense (Red clover)]                           | AT4G12730 | FLA2 (FLA2)                                                                                                                       | Cell Structure |
| Gma.4418.1.S1_at      | 0.000254546 | 2.08281 | AW310969 | Putative beta-1,3-glucanase [Oryza sativa (japonica cultivar-group)]                                             | 0         | glycosyl hydrolase family protein 17                                                                                              | Cell Structure |
| Gma.4491.1.S1_at      | 0.000601478 | 2.59955 | BI967493 | NA                                                                                                               | AT2G20520 | FLA6 (FLA6)                                                                                                                       | Cell Structure |
| Gma.5666.2.S1_at      | 1.90723E-05 | 2.00872 | BE609637 | Tubulin beta-1 chain [Zea mays (Maize)]                                                                          | AT1G75780 | TUB1 (tubulin beta-1 chain); structural molecule                                                                                  | Cell Structure |
| Gma.5744.1.S1_at      | 0.000132273 | 2.0912  | CA802118 | Multicopper oxidase, type 1 [Medicago truncatula (Barrel medic)]                                                 | AT4G22010 | SKS4 (SKU5 Similar 4); copper ion binding / oxidoreductase                                                                        | Cell Structure |
| Gma.5744.2.S1_at      | 0.00253025  | 2.41092 | BF068954 | Multicopper oxidase, type 1 [Medicago truncatula (Barrel medic)]                                                 | AT4G22010 | SKS4 (SKU5 Similar 4); copper ion binding / oxidoreductase                                                                        | Cell Structure |
| Gma.5949.1.A1_at      | 0.000215126 | 2.15627 | CD412339 | Histone H3 [Triticum aestivum (Wheat)]                                                                           | AT5G65360 | histone H3                                                                                                                        | Cell Structure |
| Gma.6199.1.S1_at      | 1.45469E-06 | 4.13159 | BQ612015 | AT5g66920/MUD21 18 [Arabidopsis thaliana (Mouse-ear cress)]                                                      | AT5G66920 | SKS17 (SKU5 Similar 17); copper ion binding / oxidoreductase                                                                      | Cell Structure |
| Gma.8546.1.S1_at      | 0.00116003  | 2.23542 | AW349424 | Putative phi-1 protein [Arabidopsis thaliana (Mouse-ear cress)]                                                  | AT5G44130 | fasciclin-like arabinogalactan-protein, putative                                                                                  | Cell Structure |
| Gma.987.1.S1_at       | 0.00445076  | 2.88416 | AW100853 | Alpha-expansin precursor [Gossypium hirsutum (Upland cotton)]                                                    | 0         | 0                                                                                                                                 | Cell Structure |
| GmaAffx.11204.2.S1_at | 0.00116073  | 2.08404 | AW706352 | NA                                                                                                               | AT2G45470 | FLA8 (Arabinogalactan protein 8)                                                                                                  | Cell Structure |
| GmaAffx.12832.1.S1_at | 0.000651927 | 2.16193 | BG363116 | Probable xyloglucan endotransglucosylase/hydrolase protein 33 precursor [Arabidopsis thaliana (Mouse-ear cress)] | AT1G10550 | XTH33 (xyloglucan:xyloglucosyl transferase 33); hydrolase, acting on glycosyl bonds                                               | Cell Structure |
| GmaAffx.16018.1.S1_at | 2.9704E-06  | 2.50998 | BE821618 | Beta-Ig-H3/fasciclin [Medicago truncatula (Barrel medic)]                                                        | AT5G03170 | FLA11 (fasciclin-like arabinogalactan-protein 11)                                                                                 | Cell Structure |
| GmaAffx.22677.1.S1_at | 0.000143557 | 2.39514 | BG507403 | Beta-Ig-H3/fasciclin [Medicago truncatula (Barrel medic)]                                                        | AT5G03170 | FLA11 (fasciclin-like arabinogalactan-protein 11)                                                                                 | Cell Structure |
| GmaAffx.248.1.S1_at   | 0.000133983 | 2.37155 | AW311298 | F21M11.2 protein [Arabidopsis thaliana (Mouse-ear cress)]                                                        | AT1G04040 | acid phosphatase class B family protein                                                                                           | Cell Structure |
| GmaAffx.3369.1.S1_at  | 0.00432528  | 2.01261 | BU548983 | Probable xyloglucan endotransglucosylase/hydrolase protein 32 precursor [Arabidopsis thaliana (Mouse-ear cress)] | AT2G36870 | xyloglucan:xyloglucosyl transferase, putative / xyloglucan endotransglycosylase, putative / endo-xyloglucan transferase, putative | Cell Structure |
| GmaAffx.34085.1.A1_at | 1.07639E-06 | 2.07645 | CD418272 | Tubulin beta-1 chain [Zea mays (Maize)]                                                                          | 0         | 0                                                                                                                                 | Cell Structure |
| GmaAffx.34532.1.S1_at | 0.000300672 | 2.21911 | BG362816 | Glycoside hydrolase, family 1 [Medicago truncatula (Barrel medic)]                                               | AT1G61810 | BGLU45; hydrolase, hydrolyzing O-glycosyl compounds                                                                               | Cell Structure |
| GmaAffx.34697.1.S1_at | 7.27331E-08 | 2.60921 | AW433263 | EXGT1 [Pisum sativum (Garden pea)]                                                                               | AT5G13870 | EXGT-A4 (ENDOXYLOGLUCAN TRANSFERASE A4); hydrolase, acting on glycosyl bonds                                                      | Cell Structure |
| GmaAffx.41724.1.S1_at | 0.000207097 | 2.06249 | BI968713 | Microtubule-associated protein EB1-like protein [Medicago truncatula (Barrel medic)]                             | 0         | ATEB1A (Arabidopsis thaliana Microtubule End Binding Protein EB1A); microtubule binding                                           | Cell Structure |

|                         |             |         |          |                                                                                              |                         |                                                                                                                                                                                                                    |                |
|-------------------------|-------------|---------|----------|----------------------------------------------------------------------------------------------|-------------------------|--------------------------------------------------------------------------------------------------------------------------------------------------------------------------------------------------------------------|----------------|
| GmaAffx.41724.2.S1_at   | 0.00612844  | 2.0318  | BG047062 | Microtubule-associated protein EB1-like protein [Medicago truncatula (Barrel medic)]         | AT5G62500               | ATEB1B (Arabidopsis thaliana Microtubule End Binding Protein EB1A); microtubule binding                                                                                                                            | Cell Structure |
| GmaAffx.46389.1.S1_at   | 0.00125731  | 2.31477 | BM522568 | CG4869-PA [Drosophila melanogaster (Fruit fly)]                                              | AT5G44340               | TUB4 (tubulin beta-4 chain)                                                                                                                                                                                        | Cell Structure |
| GmaAffx.50714.1.S1_at   | 8.09042E-05 | 2.43888 | BE021980 | Alpha-L-arabinofuranosidase [Raphanus sativus (Radish)]                                      | AT5G64572;<br>AT5G64570 | [AT5G64570, XYL4 (beta-xylosidase 4); hydrolase, hydrolyzing O-glycosyl compounds]                                                                                                                                 | Cell Structure |
| GmaAffx.51445.1.S1_at   | 0.000193689 | 2.03362 | BQ612160 | Monocopper oxidase-like protein SKS1 precursor [Arabidopsis thaliana (Mouse-ear cress)]      | AT4G25240               | SKS1 (SKU5 SIMILAR 1); copper ion binding                                                                                                                                                                          | Cell Structure |
| GmaAffx.54479.2.A1_s_at | 0.011099    | 2.75256 | CD405056 | Gonadotropin, beta chain; Gibberellin regulated protein [Medicago truncatula (Barrel medic)] | AT5G14920               | gibberellin-regulated family protein                                                                                                                                                                               | Cell Structure |
| GmaAffx.54716.1.S1_s_at | 0.000041334 | 2.20116 | BI699590 | Kinesin related protein [Lycopersicon esculentum (Tomato)]                                   | AT4G26660               | similar to unknown protein [Arabidopsis thaliana] (TAIR:AT5G55520.2); similar to kinesin related protein [Lycopersicon esculentum] (GB:AAO15358.1); contains InterPro domain Kinesin-related; (InterPro:IPR010544) | Cell Structure |
| GmaAffx.62345.1.S1_at   | 3.02761E-06 | 2.3404  | BQ630544 | Endo-1,4-beta-glucanase precursor [Pisum sativum (Garden pea)]                               | AT1G22880               | glycosyl hydrolase family 9 protein                                                                                                                                                                                | Cell Structure |
| GmaAffx.65868.1.A1_at   | 0.000101145 | 2.21476 | CD401651 | Calponin-like actin-binding; Kinesin, motor region [Medicago truncatula (Barrel medic)]      | 0                       | 0                                                                                                                                                                                                                  | Cell Structure |
| GmaAffx.671.1.S1_at     | 7.81714E-05 | 2.07901 | CA785167 | Alpha-expansin 4 precursor [Arabidopsis thaliana (Mouse-ear cress)]                          | AT2G39700               | ATEXPA4 (ARABIDOPSIS THALIANA EXPANSIN A4)                                                                                                                                                                         | Cell Structure |
| GmaAffx.68709.1.A1_at   | 3.19641E-05 | 2.33765 | BI969418 | Endo-1,4-beta-glucanase precursor [Pisum sativum (Garden pea)]                               | AT1G71380               | glycosyl hydrolase family 9 protein                                                                                                                                                                                | Cell Structure |
| GmaAffx.69508.1.S1_at   | 0.0113959   | 2.19323 | BQ299262 | Cellulose synthase [Populus tremula x Populus tremuloides]                                   | 0                       | 0                                                                                                                                                                                                                  | Cell Structure |
| GmaAffx.69994.1.S1_at   | 0.000336577 | 2.12783 | CD417025 | Phi-1 protein [Nicotiana tabacum (Common tobacco)]                                           | AT4G08950               | phosphate-responsive protein, putative (EXO)                                                                                                                                                                       | Cell Structure |
| GmaAffx.71683.1.S1_at   | 0.00522031  | 2.24667 | AW734979 | Protein At3g52525 [Arabidopsis thaliana (Mouse-ear cress)]                                   | 0                       | ATOFP6/OFPP6 (Arabidopsis thaliana ovate family protein 6)                                                                                                                                                         | Cell Structure |
| GmaAffx.71901.1.S1_s_at | 1.31755E-05 | 2.34451 | BE022356 | Beta-1,3-glucanase [Camellia sinensis (Tea)]                                                 | AT1G66250               | glycosyl hydrolase family 17 protein                                                                                                                                                                               | Cell Structure |
| GmaAffx.75219.1.S1_at   | 0.000371607 | 2.13801 | BE020773 | Hypothetical protein At2g35860 [Arabidopsis thaliana (Mouse-ear cress)]                      | AT3G52370               | beta-Ig-H3 domain-containing protein / fasciclin domain-containing protein                                                                                                                                         | Cell Structure |
| GmaAffx.75875.1.S1_at   | 0.0125658   | 2.37611 | AW598284 | Actin bundling protein ABP135 [Lilium longiflorum (Trumpet lily)]                            | AT3G57410               | VLN3 (VILLIN 3); actin binding                                                                                                                                                                                     | Cell Structure |
| GmaAffx.77113.1.S1_at   | 0.00797976  | 4.96571 | BG238990 | Ankyrin [Medicago truncatula (Barrel medic)]                                                 | 0                       | 0                                                                                                                                                                                                                  | Cell Structure |
| GmaAffx.79075.1.S1_at   | 0.000210264 | 2.03581 | BE824264 | Endo-1,4-beta-glucanase precursor [Glycine max (Soybean)]                                    | AT4G39010               | glycosyl hydrolase family 9 protein                                                                                                                                                                                | Cell Structure |
| GmaAffx.79361.1.S1_at   | 0.0009741   | 2.56043 | CA785641 | Glycoside hydrolase, family 28 [Medicago truncatula (Barrel medic)]                          | AT5G17200               | glycoside hydrolase family 28 protein / polygalacturonase (pectinase) family protein                                                                                                                               | Cell Structure |
| GmaAffx.85140.1.S1_at   | 0.000261433 | 2.01794 | BF069014 | Phytochelatin synthetase-like protein [Phaseolus vulgaris (Kidney bean) (French bean)]       | AT5G60920               | COB (COBRA)                                                                                                                                                                                                        | Cell Structure |

|                         |             |         |          |                                                                                                                                             |                         |                                                                                                                                   |                   |
|-------------------------|-------------|---------|----------|---------------------------------------------------------------------------------------------------------------------------------------------|-------------------------|-----------------------------------------------------------------------------------------------------------------------------------|-------------------|
| GmaAffx.87042.1.S1_at   | 0.000282542 | 2.25383 | AW596159 | Putative monocopper oxidase precursor [Arabidopsis thaliana (Mouse-ear cress)]                                                              | AT5G51480               | SKS2 (SKU5 SIMILAR 2); copper ion binding                                                                                         | Cell Structure    |
| GmaAffx.87808.1.S1_at   | 4.6095E-06  | 2.39379 | BM522465 | NA                                                                                                                                          | AT5G60490               | FLA12 (fasciclin-like arabinogalactan-protein 12)                                                                                 | Cell Structure    |
| GmaAffx.88219.1.S1_at   | 0.000447929 | 2.61308 | BE330621 | Endo-xyloglucan transferase like protein [Arabidopsis thaliana (Mouse-ear cress)]                                                           | AT1G11545               | xyloglucan:xyloglucosyl transferase, putative / xyloglucan endotransglycosylase, putative / endo-xyloglucan transferase, putative | Cell Structure    |
| GmaAffx.89045.1.A1_s_at | 3.44631E-05 | 2.20908 | CK605938 | Endo-xyloglucan transferase like protein [Arabidopsis thaliana (Mouse-ear cress)]                                                           | AT1G11545               | xyloglucan:xyloglucosyl transferase, putative / xyloglucan endotransglycosylase, putative / endo-xyloglucan transferase, putative | Cell Structure    |
| GmaAffx.90617.1.S1_s_at | 0.00177939  | 2.28856 | CF806342 | Glycoside hydrolase, family 1 [Medicago truncatula (Barrel medic)]                                                                          | AT2G44480               | glycosyl hydrolase family 1 protein                                                                                               | Cell Structure    |
| GmaAffx.91763.1.S1_s_at | 4.01948E-05 | 3.38683 | CF807488 | Xyloglucan endotransglucosylase/hydrolase protein A precursor [Phaseolus angularis (Adzuki bean) (Vigna angularis)]                         | AT5G13870               | EXGT-A4 (ENDOXYLOGLUCAN TRANSFERASE A4); hydrolase, acting on glycosyl bonds                                                      | Cell Structure    |
| GmaAffx.91763.1.S1_x_at | 3.19428E-07 | 2.65594 | CF807488 | Xyloglucan endotransglucosylase/hydrolase protein A precursor [Phaseolus angularis (Adzuki bean) (Vigna angularis)]                         | AT5G13870               | EXGT-A4 (ENDOXYLOGLUCAN TRANSFERASE A4); hydrolase, acting on glycosyl bonds                                                      | Cell Structure    |
| GmaAffx.93073.1.S1_s_at | 0.000207027 | 2.54114 | CF808798 | Glucan endo-1,3-beta-glucosidase precursor (EC 3.2.1.39) ((1->3)-beta-glucan endohydrolase) ((1->3)-beta-glucanase) [Glycine max (Soybean)] | AT3G57270               | BG1 (BETA-1,3-GLUCANASE 1); hydrolase, hydrolyzing O-glycosyl compounds                                                           | Cell Structure    |
| GmaAffx.93198.1.S1_x_at | 0.00449282  | 2.10203 | CF808912 | Tubulin beta-1 chain [Zea mays (Maize)]                                                                                                     | AT1G75780               | TUB1 (tubulin beta-1 chain); structural molecule                                                                                  | Cell Structure    |
| GmaAffx.93619.1.S1_s_at | 0.000970792 | 2.80204 | CF809344 | Putative phi-1 protein [Arabidopsis thaliana (Mouse-ear cress)]                                                                             | AT2G20520               | FLA6 (FLA6)                                                                                                                       | Cell Structure    |
| Gma.10658.1.A1_at       | 0.000128524 | 2.78816 | CA852384 | Ripening related protein [Glycine max (Soybean)]                                                                                            | AT1G70890               | major latex protein-related / MLP-related                                                                                         | Disease & Defense |
| Gma.11336.2.S1_at       | 1.03319E-05 | 2.06177 | CA852094 | NA                                                                                                                                          | AT1G18250               | ATLP-1 (Arabidopsis thaumatin-like protein 1)                                                                                     | Disease & Defense |
| Gma.12018.1.S1_at       | 0.000117013 | 2.72187 | CD398677 | Phytoalexin-deficient 4-2 protein [Solanum tuberosum (Potato)]                                                                              | AT3G52430               | PAD4 (PHYTOALEXIN DEFICIENT 4); triacylglycerol lipase                                                                            | Disease & Defense |
| Gma.12286.1.S1_at       | 0.00244569  | 2.64097 | AW396660 | NA                                                                                                                                          | 0                       | 0                                                                                                                                 | Disease & Defense |
| Gma.14288.1.S1_at       | 0.00187607  | 2.37165 | CA852004 | Peroxidase precursor [Quercus suber (Cork oak)]                                                                                             | 0                       | peroxidase, putative                                                                                                              | Disease & Defense |
| Gma.1539.1.S1_at        | 4.35981E-05 | 2.36881 | CA802612 | Haem peroxidase, plant/fungal/bacterial [Medicago truncatula (Barrel medic)]                                                                | AT4G37530;<br>AT4G37520 | [AT4G37530, peroxidase, putative];[AT4G37520, peroxidase 50 (PER50) (P50) (PRXR2)]                                                | Disease & Defense |
| Gma.17816.2.S1_s_at     | 0.00834722  | 2.06875 | BE020641 | Cationic peroxidase 1 precursor [Arachis hypogaea (Peanut)]                                                                                 | AT5G05340               | peroxidase, putative                                                                                                              | Disease & Defense |
| Gma.363.1.S1_at         | 0.00298367  | 2.32988 | AW349408 | NA                                                                                                                                          | AT1G75800               | pathogenesis-related thaumatin family protein                                                                                     | Disease & Defense |
| Gma.4829.1.S1_at        | 8.84768E-05 | 3.14015 | AW309606 | Class III peroxidase [Gossypium hirsutum (Upland cotton)]                                                                                   | AT5G05340               | peroxidase, putative                                                                                                              | Disease & Defense |
| Gma.4919.1.S1_at        | 0.000113466 | 2.28861 | AW350788 | Class III peroxidase [Gossypium hirsutum (Upland cotton)]                                                                                   | AT5G05340               | peroxidase, putative                                                                                                              | Disease & Defense |

|                         |             |         |          |                                                                                                           |           |                                                                                  |                   |
|-------------------------|-------------|---------|----------|-----------------------------------------------------------------------------------------------------------|-----------|----------------------------------------------------------------------------------|-------------------|
| Gma.6332.1.S1_at        | 2.35716E-06 | 2.26315 | BG237174 | F5M15.18 [Arabidopsis thaliana (Mouse-ear cross)]                                                         | AT5G63380 | 4-coumarate--CoA ligase family protein / 4-coumaroyl-CoA synthase family protein | Disease & Defense |
| Gma.6452.1.A1_at        | 0.00464534  | 2.87695 | BQ298226 | Polyphenol oxidase [Trifolium pratense (Red clover)]                                                      | 0         | 0                                                                                | Disease & Defense |
| Gma.7180.1.S1_at        | 0.00402761  | 4.71503 | AI794693 | Subtilisin inhibitor CLSI-II [Contains: Subtilisin inhibitor CLSI- III] [Canavalia lineata]               | 0         | 0                                                                                | Disease & Defense |
| Gma.8365.1.S1_at        | 0.000509395 | 2.59409 | CD396813 | Hypothetical protein At2g37330 [Arabidopsis thaliana (Mouse-ear cross)]                                   | AT2G37330 | ALS3 (ALUMINUM SENSITIVE 3)                                                      | Disease & Defense |
| Gma.8524.1.S1_at        | 1.23134E-06 | 3.40053 | U51194   | Peroxidase [Glycine max (Soybean)]                                                                        | AT5G42180 | peroxidase 64 (PER64) (P64) (PRXR4)                                              | Disease & Defense |
| Gma.8525.1.S1_s_at      | 1.08457E-06 | 3.35138 | AI966178 | NA                                                                                                        | AT5G42180 | peroxidase 64 (PER64) (P64) (PRXR4)                                              | Disease & Defense |
| Gma.8957.1.A1_at        | 0.000664082 | 3.23347 | BU764905 | NA                                                                                                        | AT1G70890 | major latex protein-related / MLP-related                                        | Disease & Defense |
| Gma.9638.1.A1_at        | 7.23535E-05 | 2.1419  | CA936403 | ADR6 protein [Glycine max (Soybean)]                                                                      | AT5G25610 | RD22 (RESPONSIVE TO DESSICATION 22)                                              | Disease & Defense |
| GmaAffx.10710.1.S1_s_at | 0.00016012  | 2.4075  | AW278629 | Pathogenesis-related protein PR-1 precursor [Medicago truncatula (Barrel medic)]                          | AT4G30320 | allergen V5/Tpx-1-related family protein                                         | Disease & Defense |
| GmaAffx.12305.1.S1_at   | 0.000521764 | 2.50572 | BE022059 | NA                                                                                                        | AT5G23400 | disease resistance family protein / LRR family protein                           | Disease & Defense |
| GmaAffx.1833.1.A1_at    | 0.000577231 | 5.04181 | BU547841 | Hcr2-p3 [Lycopersicon pimpinellifolium (Currant tomato)]                                                  | AT5G23400 | disease resistance family protein / LRR family protein                           | Disease & Defense |
| GmaAffx.2172.1.S1_at    | 0.00901625  | 2.13704 | CD402944 | AT3g63200/F16M2 50 [Arabidopsis thaliana (Mouse-ear cross)]                                               | AT3G63200 | PLA IIIB/PLP9 (Patatin-like protein 9); nutrient reservoir                       | Disease & Defense |
| GmaAffx.23295.1.S1_at   | 0.000051639 | 2.13061 | BI968028 | T19F11.6 protein [Arabidopsis thaliana (Mouse-ear cross)]                                                 | AT3G11660 | NHL1 (NDR1/HIN1-like 1)                                                          | Disease & Defense |
| GmaAffx.47160.1.A1_at   | 0.00552876  | 5.29989 | BU550419 | Crocin dialdehyde-like [Oryza sativa (japonica cultivar-group)]                                           | AT3G63520 | CCD1 (CAROTENOID CLEAVAGE DIOXYGENASE 1)                                         | Disease & Defense |
| GmaAffx.50446.1.S1_at   | 0.00363158  | 4.87596 | BQ080496 | Cationic peroxidase 1 precursor [Arachis hypogaea (Peanut)]                                               | AT5G05340 | peroxidase, putative                                                             | Disease & Defense |
| GmaAffx.50446.2.S1_at   | 0.00450739  | 2.7686  | BG508856 | Peroxidase precursor [Picea abies (Norway spruce) (Picea excelsa)]                                        | AT5G05340 | peroxidase, putative                                                             | Disease & Defense |
| GmaAffx.5076.1.S1_s_at  | 0.00232575  | 2.05889 | BM139563 | Harpin-induced 1 [Medicago truncatula (Barrel medic)]                                                     | 0         | 0                                                                                | Disease & Defense |
| GmaAffx.53152.1.S1_at   | 0.0121161   | 2.00875 | BE823592 | RING-H2 subgroup RHE protein [Populus alba x Populus tremula]                                             | AT3G16720 | ATL2 (Arabidopsis T?xicos en Levadura 2); protein binding / zinc ion binding     | Disease & Defense |
| GmaAffx.57878.1.S1_at   | 0.0154542   | 3.90746 | CA799481 | Probable polygalacturonase non-catalytic subunit JP650 precursor [Arabidopsis thaliana (Mouse-ear cross)] | AT1G70370 | BURP domain-containing protein / polygalacturonase, putative                     | Disease & Defense |
| GmaAffx.57878.2.S1_at   | 0.00286445  | 2.18002 | BE610836 | NA                                                                                                        | AT1G60390 | BURP domain-containing protein / polygalacturonase, putative                     | Disease & Defense |
| GmaAffx.73174.1.S1_at   | 0.00261227  | 2.70355 | BI699854 | Protein At4g14723 [Arabidopsis thaliana (Mouse-ear cross)]                                                | 0         | allergen-related                                                                 | Disease & Defense |
| GmaAffx.73978.1.S1_at   | 8.00217E-05 | 2.24923 | BQ629101 | NA                                                                                                        | AT3G07040 | RPM1 (RESISTANCE TO P. SYRINGAE PV MACULICOLA 1)                                 | Disease & Defense |
| GmaAffx.792.3.S1_at     | 0.00219519  | 2.68169 | AW509489 | Putative epoxide hydrolase [Oryza sativa (japonica cultivar-group)]                                       | AT4G02340 | epoxide hydrolase, putative                                                      | Disease & Defense |
| GmaAffx.86757.1.S1_at   | 0.000679911 | 2.22103 | BM567976 | NA                                                                                                        | AT5G28010 | Bet v I allergen family protein                                                  | Disease & Defense |

|                         |             |         |          |                                                                                                        |           |                                                                                                                                                |                   |
|-------------------------|-------------|---------|----------|--------------------------------------------------------------------------------------------------------|-----------|------------------------------------------------------------------------------------------------------------------------------------------------|-------------------|
| GmaAffx.8704.1.A1_at    | 0.0121119   | 3.24452 | BG156185 | NA                                                                                                     | AT1G49570 | peroxidase, putative                                                                                                                           | Disease & Defense |
| GmaAffx.8704.2.S1_at    | 0.00695909  | 3.21946 | BG042982 | NA                                                                                                     | AT1G49570 | peroxidase, putative                                                                                                                           | Disease & Defense |
| GmaAffx.88699.1.S1_s_at | 0.000441136 | 2.29853 | CK606025 | OSJNBa0006A01.6 protein [Oryza sativa (Rice)]                                                          | AT5G28010 | Bet v I allergen family protein                                                                                                                | Disease & Defense |
| GmaAffx.90350.1.A1_at   | 0.000205848 | 2.15889 | CF806075 | Class1 chitinase [Pisum sativum (Garden pea)]                                                          | AT1G05850 | POM1 (POM-POM1); chitinase                                                                                                                     | Disease & Defense |
| GmaAffx.91353.1.S1_s_at | 0.000216846 | 2.2138  | CF807078 | Peroxidase [Glycine max (Soybean)]                                                                     | AT1G05260 | RCI3 (RARE COLD INDUCIBLE GENE 3); peroxidase                                                                                                  | Disease & Defense |
| GmaAffx.91353.1.S1_x_at | 9.04652E-05 | 2.00445 | CF807078 | Peroxidase [Glycine max (Soybean)]                                                                     | AT1G05260 | RCI3 (RARE COLD INDUCIBLE GENE 3); peroxidase                                                                                                  | Disease & Defense |
| GmaAffx.92917.1.S1_s_at | 0.000016668 | 2.37355 | CF808642 | Peroxidase precursor [Glycine max (Soybean)]                                                           | AT1G05260 | RCI3 (RARE COLD INDUCIBLE GENE 3); peroxidase                                                                                                  | Disease & Defense |
| GmaAffx.93041.1.S1_s_at | 0.00405513  | 2.17042 | CF808766 | Thaumatococcus, pathogenesis-related [Medicago truncatula (Barrel medic)]                              | AT1G18250 | ATLP-1 (Arabidopsis thaumatin-like protein 1)                                                                                                  | Disease & Defense |
| GmaAffx.93487.1.S1_s_at | 0.000265235 | 2.00354 | CF809212 | Major pollen allergen Bet v 1-M/N [Betula verrucosa (White birch) (Betula pendula)]                    | AT1G24020 | Bet v I allergen family protein                                                                                                                | Disease & Defense |
| Gma.13278.1.A1_at       | 5.42495E-05 | 2.11342 | CD391349 | Emb[CAB72177.1 [Arabidopsis thaliana (Mouse-ear cress)]                                                | AT5G03870 | glutaredoxin family protein                                                                                                                    | Energy            |
| Gma.17884.1.S1_s_at     | 0.00017731  | 2.39633 | BE023599 | Thioredoxin domain 2 [Medicago truncatula (Barrel medic)]                                              | AT1G11530 | ATCXXS1 (C-TERMINAL CYSTEINE RESIDUE IS CHANGED TO A SERINE 1); thiol-disulfide exchange intermediate                                          | Energy            |
| Gma.2590.10.S1_at       | 0.000165129 | 2.31959 | BM086662 | Blue (Type 1) copper domain [Medicago truncatula (Barrel medic)]                                       | AT2G25060 | plastocyanin-like domain-containing protein                                                                                                    | Energy            |
| Gma.3160.1.S1_at        | 6.93511E-05 | 3.33634 | BG507816 | Thioredoxin H [Nicotiana glauca (Winged tobacco) (Persian tobacco)]                                    | AT5G39950 | ATTRX2 (Arabidopsis thioredoxin h2, thioredoxin H-type 1); thiol-disulfide exchange intermediate                                               | Energy            |
| Gma.6151.1.S1_at        | 2.11195E-05 | 2.86404 | BQ611806 | Dimethylaniline monooxygenase-like protein [Arabidopsis thaliana (Mouse-ear cress)]                    | AT5G07800 | flavin-containing monooxygenase family protein / FMO family protein                                                                            | Energy            |
| Gma.883.1.S1_at         | 0.000167623 | 2.22505 | CD395912 | Hypothetical protein OSJNBa0078O01.30 [Oryza sativa (japonica cultivar-group)]                         | AT5G53490 | thylakoid lumenal 17.4 kDa protein, chloroplast                                                                                                | Energy            |
| GmaAffx.1943.1.S1_at    | 1.56385E-06 | 2.73724 | BU765258 | AX110P [Daucus carota (Carrot)]                                                                        | AT4G09670 | oxidoreductase family protein                                                                                                                  | Energy            |
| GmaAffx.53622.1.S1_s_at | 0.0097445   | 3.41534 | BE583854 | Probable protein disulfide-isomerase A4 precursor [Caenorhabditis elegans]                             | AT2G47470 | ATPDIL2-1/MEE30/UNE5 (PDI-LIKE 2-1, maternal effect embryo arrest 30, unfertilized embryo sac 5); thiol-disulfide exchange intermediate        | Energy            |
| GmaAffx.60443.1.S1_at   | 0.0116375   | 2.0472  | BG238788 | Pyrophosphate--fructose 6-phosphate 1-phosphotransferase subunit beta [Ricinus communis (Castor bean)] | AT1G12000 | pyrophosphate--fructose-6-phosphate 1-phosphotransferase beta subunit, putative / pyrophosphate-dependent 6-phosphofructose-1-kinase, putative | Energy            |
| GmaAffx.77264.1.S1_at   | 0.0124794   | 2.27892 | CA935091 | OSJNBa0073L04.11 protein [Oryza sativa (japonica cultivar-group)]                                      | AT5G03870 | glutaredoxin family protein                                                                                                                    | Energy            |
| GmaAffx.80064.1.S1_at   | 0.000681034 | 2.18155 | BQ081542 | ATP citrate lyase b-subunit [Lupinus albus (White lupin)]                                              | AT1G10670 | ACLA-1 (ATP-citrate lyase A-1)                                                                                                                 | Energy            |
| GmaAffx.92537.1.S1_at   | 0.00285842  | 2.15875 | CF808262 | Thioredoxin domain 2 [Medicago truncatula (Barrel medic)]                                              | AT1G11530 | ATCXXS1 (C-TERMINAL CYSTEINE RESIDUE IS CHANGED TO A SERINE 1); thiol-disulfide exchange intermediate                                          | Energy            |
| GmaAffx.92895.1.S1_at   | 0.0125941   | 3.10104 | CF808620 | Putative fructose bisphosphate aldolase [Arabidopsis thaliana (Mouse-ear cress)]                       | AT2G36460 | fructose-bisphosphate aldolase, putative                                                                                                       | Energy            |

|                         |             |         |          |                                                                                          |           |                                                                                  |                       |
|-------------------------|-------------|---------|----------|------------------------------------------------------------------------------------------|-----------|----------------------------------------------------------------------------------|-----------------------|
| GmaAffx.92935.1.S1_s_at | 0.0129849   | 2.14637 | CF808660 | Light harvesting chlorophyll a /b binding protein of PSII [Euglena gracilis]             | 0         | LHCB2.1 (Photosystem II light harvesting complex gene 2.1); chlorophyll binding  | Energy                |
| GmaAffx.9843.1.S1_at    | 5.89746E-05 | 2.47888 | CD416791 | At1g64640 [Arabidopsis thaliana (Mouse-ear cress)]                                       | AT1G64640 | plastocyanin-like domain-containing protein                                      | Energy                |
| Gma.11175.1.S1_at       | 4.51315E-05 | 2.23516 | AW349743 | Alcohol dehydrogenase 7 [Vitis vinifera (Grape)]                                         | AT3G18280 | protease inhibitor/seed storage/lipid transfer protein (LTP) family protein      | Intracellular Traffic |
| Gma.1494.1.S1_x_at      | 0.000082433 | 2.00842 | BF598755 | NA                                                                                       | AT2G10940 | protease inhibitor/seed storage/lipid transfer protein (LTP) family protein      | Intracellular Traffic |
| Gma.15048.2.S1_at       | 0.00825785  | 2.19357 | BG238374 | Putative zinc finger protein [Arabidopsis thaliana (Mouse-ear cress)]                    | AT3G15680 | zinc finger (Ran-binding) family protein                                         | Intracellular Traffic |
| Gma.2972.1.S1_at        | 9.45156E-05 | 2.1598  | AW350602 | Hypothetical protein [Cicer arietinum (Chickpea) (Garbanzo)]                             | AT1G72160 | SEC14 cytosolic factor family protein / phosphoglyceride transfer family protein | Intracellular Traffic |
| Gma.3291.1.S1_at        | 2.44021E-05 | 2.46814 | AF248055 | Proline-rich protein [Glycine max (Soybean)]                                             | AT2G45180 | protease inhibitor/seed storage/lipid transfer protein (LTP) family protein      | Intracellular Traffic |
| Gma.3440.1.S1_s_at      | 5.53801E-06 | 2.17774 | BE820653 | Annexin, putative [Medicago truncatula (Barrel medic)]                                   | AT5G12380 | annexin, putative                                                                | Intracellular Traffic |
| Gma.3440.2.S1_a_at      | 0.00015716  | 2.08471 | CD418071 | Annexin, putative [Medicago truncatula (Barrel medic)]                                   | AT5G12380 | annexin, putative                                                                | Intracellular Traffic |
| Gma.3723.1.S1_at        | 0.000668464 | 2.04496 | BI424448 | Nonspecific lipid-transfer protein 2 [Prunus armeniaca (Apricot)]                        | AT3G18280 | protease inhibitor/seed storage/lipid transfer protein (LTP) family protein      | Intracellular Traffic |
| Gma.4050.1.S1_at        | 1.05879E-05 | 3.41604 | AW317179 | Putative 14-kDa proline-rich protein [Cicer arietinum (Chickpea) (Garbanzo)]             | AT2G45180 | protease inhibitor/seed storage/lipid transfer protein (LTP) family protein      | Intracellular Traffic |
| Gma.5357.1.S1_at        | 0.000344168 | 2.25283 | AW164593 | Annexin, putative [Medicago truncatula (Barrel medic)]                                   | AT5G12380 | annexin, putative                                                                | Intracellular Traffic |
| Gma.6146.1.S1_at        | 0.000132394 | 4.53386 | BI969869 | Putative 14-kDa proline-rich protein [Cicer arietinum (Chickpea) (Garbanzo)]             | AT2G45180 | protease inhibitor/seed storage/lipid transfer protein (LTP) family protein      | Intracellular Traffic |
| Gma.6427.2.S1_a_at      | 0.000219656 | 2.19575 | AW349057 | Calnexin [Glycine max (Soybean)]                                                         | AT5G61790 | calnexin 1 (CNX1)                                                                | Intracellular Traffic |
| Gma.6427.2.S1_x_at      | 0.00229631  | 2.04856 | AW349057 | Calnexin [Glycine max (Soybean)]                                                         | AT5G61790 | calnexin 1 (CNX1)                                                                | Intracellular Traffic |
| Gma.8016.1.S1_at        | 9.50517E-05 | 2.66122 | BU547223 | Generic methyltransferase [Medicago truncatula (Barrel medic)]                           | AT4G00750 | dehydration-responsive family protein                                            | Intracellular Traffic |
| GmaAffx.20084.1.S1_at   | 0.00890168  | 2.22757 | CA799812 | Vacuolar protein sorting-associated protein 26-like protein [Solanum tuberosum (Potato)] | AT5G53530 | vacuolar protein sorting-associated protein 26, putative / VPS26, putative       | Intracellular Traffic |
| GmaAffx.52578.1.S1_at   | 0.00294291  | 2.0145  | CD406471 | Copine I-like protein [Oryza sativa (japonica cultivar-group)]                           | AT1G79380 | copine-related                                                                   | Intracellular Traffic |
| GmaAffx.67979.1.S1_at   | 0.000687035 | 2.3807  | BG238184 | transporter [Arabidopsis thaliana]                                                       | AT5G10840 | endomembrane protein 70, putative                                                | Intracellular Traffic |
| GmaAffx.68244.1.S1_at   | 0.000987451 | 2.10841 | BE210278 | Patellin-4 [Arabidopsis thaliana (Mouse-ear cress)]                                      | AT1G30690 | SEC14 cytosolic factor family protein / phosphoglyceride transfer family protein | Intracellular Traffic |
| GmaAffx.80464.1.S1_at   | 0.0153943   | 2.55364 | CA850542 | Arachidonic acid-induced DEA1 [Capsicum chinense (Scotch bonnet) (Bonnet pepper)]        | AT1G62510 | protease inhibitor/seed storage/lipid transfer protein (LTP) family protein      | Intracellular Traffic |
| GmaAffx.81641.1.S1_s_at | 0.000126558 | 2.42529 | BG156396 | Extensin-like protein [Glycine max (Soybean)]                                            | AT1G62510 | protease inhibitor/seed storage/lipid transfer protein (LTP) family protein      | Intracellular Traffic |
| GmaAffx.90865.1.S1_s_at | 0.00415807  | 2.12453 | CF806590 | Calnexin [Glycine max (Soybean)]                                                         | AT5G61790 | calnexin 1 (CNX1)                                                                | Intracellular Traffic |
| Gma.10072.1.S1_at       | 0.00394523  | 3.40765 | CD399353 | Protein HOTHEAD precursor [Arabidopsis thaliana (Mouse-ear cress)]                       | AT1G72970 | HTH (HOTHEAD); aldehyde-lyase                                                    | Metabolism            |
| Gma.10521.1.A1_at       | 5.09192E-06 | 2.26093 | AW310958 | NA                                                                                       | AT1G13710 | CYP78A5 (cytochrome P450, family 78, subfamily A, polypeptide 5); oxygen binding | Metabolism            |

|                     |             |         |          |                                                                                                      |                         |                                                                                                                                            |            |
|---------------------|-------------|---------|----------|------------------------------------------------------------------------------------------------------|-------------------------|--------------------------------------------------------------------------------------------------------------------------------------------|------------|
| Gma.11174.1.S1_at   | 9.11621E-05 | 2.38235 | CD405503 | Apyrase GS50 [Glycine soja (Wild soybean)]                                                           | AT5G18280               | ATAPY2 (APYRASE 2)                                                                                                                         | Metabolism |
| Gma.11848.1.S1_at   | 0.000763138 | 2.0814  | CD408549 | Monogalactosyldiacylglycerol synthase [Medicago truncatula (Barrel medic)]                           | AT5G20410               | MGD2 (monogalactosyldiacylglycerol synthase 2); 1,2-diacylglycerol 3-beta-galactosyltransferase/ transferase, transferring glycosyl groups | Metabolism |
| Gma.13058.1.A1_at   | 0.0135706   | 2.62869 | CD394760 | E-class P450, group I [Medicago truncatula (Barrel medic)]                                           | AT1G11600               | CYP77B1 (cytochrome P450, family 77, subfamily B, polypeptide 1); oxygen binding                                                           | Metabolism |
| Gma.13058.1.A1_s_at | 0.00512727  | 4.57097 | CD394760 | E-class P450, group I [Medicago truncatula (Barrel medic)]                                           | AT1G11600               | CYP77B1 (cytochrome P450, family 77, subfamily B, polypeptide 1); oxygen binding                                                           | Metabolism |
| Gma.138.1.S1_at     | 0.00312514  | 2.10476 | AF022463 | Cytochrome P450 78A3 [Glycine max (Soybean)]                                                         | AT3G61880               | CYP78A9 (CYTOCHROME P450 78A9); oxygen binding                                                                                             | Metabolism |
| Gma.14900.1.S1_at   | 0.0125048   | 2.144   | AI496668 | Hypothetical protein F5K20 250 [Arabidopsis thaliana (Mouse-ear cress)]                              | AT3G53950               | glyoxal oxidase-related                                                                                                                    | Metabolism |
| Gma.15233.1.S1_at   | 0.00120274  | 2.8686  | CD398582 | Putative metallophosphatase [Lupinus luteus (European yellow lupin)]                                 | AT5G50400               | ATPAP27/PAP27 (purple acid phosphatase 27); acid phosphatase/ protein serine/threonine phosphatase                                         | Metabolism |
| Gma.1545.2.S1_at    | 0.00216415  | 2.34552 | BG239480 | Probable mannitol dehydrogenase [Medicago sativa (Alfalfa)]                                          | AT2G21890;<br>AT2G21730 | [AT2G21890, mannitol dehydrogenase, putative];[AT2G21730, mannitol dehydrogenase, putative]                                                | Metabolism |
| Gma.15653.1.S1_at   | 1.11453E-05 | 4.75372 | BI969594 | CPRD49 protein [Vigna unguiculata (Cowpea)]                                                          | AT3G11210               | GDSL-motif lipase/hydrolase family protein                                                                                                 | Metabolism |
| Gma.16833.1.S1_s_at | 0.00571931  | 4.01798 | L34841   | Fructose-1,6-bisphosphatase, chloroplast precursor [Glycine max (Soybean)]                           | AT3G54050               | fructose-1,6-bisphosphatase, putative / D-fructose-1,6-bisphosphate 1-phosphohydrolase, putative / FB Pase, putative                       | Metabolism |
| Gma.17250.1.A1_at   | 8.31655E-06 | 2.1506  | BI969790 | UDP-glucuronosyl/UDP-glucosyltransferase [Medicago truncatula (Barrel medic)]                        | 0                       | DOGT1 (DON-GLUCOSYLTRANSFERASE); UDP-glucosyltransferase/ transferase, transferring glycosyl groups                                        | Metabolism |
| Gma.17835.1.S1_at   | 4.69003E-05 | 2.21014 | BE822840 | Galactose-binding like; Alpha-L-arabinofuranosidase, C-terminal [Medicago truncatula (Barrel medic)] | AT3G10740               | ASD1 (ALPHA-L-ARABINOFURANOSIDASE); hydrolase, acting on glycosyl bonds                                                                    | Metabolism |
| Gma.1988.1.S1_at    | 4.05846E-06 | 2.05585 | BE659231 | Probable 3-beta-hydroxysteroid-delta(8),delta(7)-isomerase [Arabidopsis thaliana (Mouse-ear cress)]  | AT1G20050               | HYD1 (Hydra 1)                                                                                                                             | Metabolism |
| Gma.2019.1.S1_at    | 1.27187E-05 | 3.00838 | U26457   | Lipoxygenase [Glycine max (Soybean)]                                                                 | AT1G55020               | LOX1 (Lipoxygenase 1); lipoxygenase                                                                                                        | Metabolism |
| Gma.2450.1.A1_at    | 0.00163407  | 2.21488 | BI970853 | Anthocyanidin 3-O-glucosyltransferase [Petunia hybrida (Petunia)]                                    | 0                       | glycosyltransferase family protein                                                                                                         | Metabolism |
| Gma.3161.1.S1_at    | 0.0130601   | 2.10813 | AF353620 | Glutamine synthetase [Glycine max (Soybean)]                                                         | AT5G35630               | GS2 (GLUTAMINE SYNTHETASE 2); glutamate-ammonia ligase                                                                                     | Metabolism |
| Gma.3988.1.S1_at    | 0.00272086  | 2.16595 | BE658819 | Hypothetical protein [Arabidopsis thaliana (Mouse-ear cress)]                                        | AT1G80160               | lactoylglutathione lyase family protein / glyoxalase I family protein                                                                      | Metabolism |
| Gma.4429.1.S1_at    | 0.000456307 | 2.30983 | BI967598 | Ascorbate oxidase [Glycine max (Soybean)]                                                            | AT5G21105               | L-ascorbate oxidase/ copper ion binding                                                                                                    | Metabolism |
| Gma.4958.1.A1_at    | 5.31447E-05 | 3.0051  | BI969925 | F12P19.5 protein [Arabidopsis thaliana (Mouse-ear cress)]                                            | 0                       | AMP-binding protein, putative                                                                                                              | Metabolism |
| Gma.5160.1.S1_at    | 0.000206327 | 2.02447 | AJ563382 | Ornithine decarboxylase [Glycine max (Soybean)]                                                      | 0                       | diaminopimelate decarboxylase, putative / DAP carboxylase, putative                                                                        | Metabolism |

|                    |             |         |          |                                                                                                            |                         |                                                                                                               |            |
|--------------------|-------------|---------|----------|------------------------------------------------------------------------------------------------------------|-------------------------|---------------------------------------------------------------------------------------------------------------|------------|
| Gma.5205.1.A1_at   | 0.000249296 | 2.15131 | BI970186 | AT5g55180/MCO15 13, putative [Medicago truncatula (Barrel medic)]                                          | AT5G67460               | glycosyl hydrolase family protein 17                                                                          | Metabolism |
| Gma.529.1.S1_x_at  | 4.56377E-06 | 2.02918 | AI939079 | Acid phosphatase precursor [Phaseolus vulgaris (Kidney bean) (French bean)]                                | AT5G34850               | ATPAP26/PAP26 (purple acid phosphatase 26); acid phosphatase/protein serine/threonine phosphatase             | Metabolism |
| Gma.5886.1.A1_at   | 0.000536655 | 2.29537 | CD395987 | Fructokinase-like protein [Cicer arietinum (Chickpea) (Garbanzo)]                                          | AT1G06030;<br>AT1G50390 | [AT1G06030, pfkB-type carbohydrate kinase family protein];[AT1G50390, fructokinase-related]                   | Metabolism |
| Gma.5992.4.S1_a_at | 9.06487E-05 | 2.39559 | BM567831 | Aldehyde dehydrogenase ALDH1a [Arabidopsis thaliana (Mouse-ear cress)]                                     | AT3G24503               | ALDH2C4 (REDUCED EPIDERMAL FLUORESCENCE1); 3-chloroallyl aldehyde dehydrogenase/ aldehyde dehydrogenase (NAD) | Metabolism |
| Gma.5992.4.S1_at   | 0.00220407  | 3.03528 | BM567831 | Aldehyde dehydrogenase ALDH1a [Arabidopsis thaliana (Mouse-ear cress)]                                     | AT3G24503               | ALDH2C4 (REDUCED EPIDERMAL FLUORESCENCE1); 3-chloroallyl aldehyde dehydrogenase/ aldehyde dehydrogenase (NAD) | Metabolism |
| Gma.5992.4.S1_x_at | 0.000140348 | 2.22436 | BM567831 | Aldehyde dehydrogenase ALDH1a [Arabidopsis thaliana (Mouse-ear cress)]                                     | AT3G24503               | ALDH2C4 (REDUCED EPIDERMAL FLUORESCENCE1); 3-chloroallyl aldehyde dehydrogenase/ aldehyde dehydrogenase (NAD) | Metabolism |
| Gma.6037.1.S1_at   | 3.40537E-05 | 2.26918 | CD390794 | NA                                                                                                         | AT2G19070               | transferase family protein                                                                                    | Metabolism |
| Gma.6211.1.S1_at   | 0.00805578  | 2.13159 | BU089706 | Expressed protein [Arabidopsis thaliana (Mouse-ear cress)]                                                 | AT5G41080               | glycerophosphoryl diester phosphodiesterase family protein                                                    | Metabolism |
| Gma.6469.1.A1_at   | 0.000164835 | 2.61314 | BI969830 | Immunoglobulin/major histocompatibility complex; 2OG-Fe(II) oxygenase [Medicago truncatula (Barrel medic)] | 0                       | 0                                                                                                             | Metabolism |
| Gma.6532.1.S1_at   | 0.000109952 | 4.33558 | BQ627617 | Class III chitinase [Medicago truncatula (Barrel medic)]                                                   | AT5G24090               | acidic endochitinase (CHIB1)                                                                                  | Metabolism |
| Gma.7085.1.S1_at   | 7.01895E-05 | 2.02664 | BE820335 | SAM (And some other nucleotide) binding motif [Medicago truncatula (Barrel medic)]                         | AT1G73600               | phosphoethanolamine N-methyltransferase 3, putative (NMT3)                                                    | Metabolism |
| Gma.7418.1.S1_at   | 0.00602641  | 3.29549 | BU547276 | F21F23.15 protein [Arabidopsis thaliana (Mouse-ear cress)]                                                 | AT1G13710               | CYP78A5 (cytochrome P450, family 78, subfamily A, polypeptide 5); oxygen binding                              | Metabolism |
| Gma.7515.1.S1_at   | 0.00636991  | 2.09895 | BU548256 | Expressed protein [Arabidopsis thaliana (Mouse-ear cress)]                                                 | AT2G06925               | ATSPLA2-ALPHA/PLA2-ALPHA (PHOSPHOLIPASE A2-ALPHA); phospholipase A2                                           | Metabolism |
| Gma.7600.1.S1_at   | 5.22721E-05 | 3.03251 | BU548955 | NA                                                                                                         | AT5G51520               | invertase/pectin methylesterase inhibitor family protein                                                      | Metabolism |
| Gma.7832.1.S1_s_at | 0.0114095   | 2.37217 | CD392810 | 3-ketoacyl-CoA synthase [Gossypium hirsutum (Upland cotton)]                                               | AT1G68530               | CUT1 (CUTICULAR 1); acyltransferase                                                                           | Metabolism |
| Gma.8215.2.S1_at   | 0.000107541 | 2.10166 | BQ296859 | Cytochrome P450 family protein, expressed [Oryza sativa (japonica cultivar group)]                         | AT1G13710               | CYP78A5 (cytochrome P450, family 78, subfamily A, polypeptide 5); oxygen binding                              | Metabolism |
| Gma.8279.1.A1_at   | 0.00259387  | 2.04051 | BU549975 | NA                                                                                                         | AT5G51520               | invertase/pectin methylesterase inhibitor family protein                                                      | Metabolism |
| Gma.8489.1.S1_at   | 0.000517244 | 2.05662 | AB030493 | Thiamin biosynthetic enzyme [Glycine max (Soybean)]                                                        | AT5G54770               | TH1 (THIAZOLE REQUIRING)                                                                                      | Metabolism |
| Gma.8520.1.S1_at   | 0.00147126  | 2.20829 | CA802722 | Acid phosphatase [Glycine max (Soybean)]                                                                   | AT5G51260               | acid phosphatase, putative                                                                                    | Metabolism |

|                         |             |         |          |                                                                                                                                                                                                                                                                 |                      |                                                                                                                                                                                                                          |            |
|-------------------------|-------------|---------|----------|-----------------------------------------------------------------------------------------------------------------------------------------------------------------------------------------------------------------------------------------------------------------|----------------------|--------------------------------------------------------------------------------------------------------------------------------------------------------------------------------------------------------------------------|------------|
| Gma.8867.2.S1_at        | 0.000511752 | 4.47747 | AW200744 | UDP-glucuronosyl/UDP-glucosyltransferase [Medicago truncatula (Barrel medic)]                                                                                                                                                                                   | AT1G22400            | UGT85A1 (UDP-glucosyl transferase 85A1); UDP-glycosyltransferase/transferase, transferring glycosyl groups / transferase, transferring hexosyl groups                                                                    | Metabolism |
| Gma.8966.1.S1_at        | 4.95548E-05 | 2.77323 | BU765374 | Lipase, class 3 [Medicago truncatula (Barrel medic)]                                                                                                                                                                                                            | 0                    | lipase class 3 family protein                                                                                                                                                                                            | Metabolism |
| Gma.9130.1.A1_at        | 6.53062E-07 | 6.69047 | BI969027 | Apyrase GS52 [Glycine soja (Wild soybean)]                                                                                                                                                                                                                      | AT5G18280            | ATAPY2 (APYRASE 2)                                                                                                                                                                                                       | Metabolism |
| Gma.9176.1.S1_at        | 0.0115441   | 3.61237 | CA802590 | UDP-glucuronosyl/UDP-glucosyltransferase [Medicago truncatula]                                                                                                                                                                                                  | AT4G01070            | UDP-glucuronosyl/UDP-glucosyl transferase family protein                                                                                                                                                                 | Metabolism |
| Gma.9185.1.S1_at        | 0.001033    | 7.36549 | AW459610 | Putative GDSL-motif lipase/acylhydrolase [Arabidopsis thaliana (Mouse-ear cress)]                                                                                                                                                                               | AT3G04290            | ATLTL1/LTL1 (LI-TOLERANT LIPASE 1); carboxylic ester hydrolase                                                                                                                                                           | Metabolism |
| Gma.9322.1.A1_at        | 0.000451046 | 2.02914 | BI969538 | Hypothetical protein F15G16.70 [Arabidopsis thaliana (Mouse-ear cress)]                                                                                                                                                                                         | 0                    | lipase class 3 family protein                                                                                                                                                                                            | Metabolism |
| Gma.9957.1.S1_at        | 5.21279E-05 | 2.07223 | BE820632 | Glucosyltransferase-7 [Phaseolus angularis (Adzuki bean) (Vigna angularis)]                                                                                                                                                                                     | AT1G05680            | UDP-glucuronosyl/UDP-glucosyl transferase family protein                                                                                                                                                                 | Metabolism |
| GmaAffx.11201.1.A1_at   | 0.00214946  | 2.14562 | CD409722 | Lipolytic enzyme, G-D-S-L [Medicago truncatula (Barrel medic)]                                                                                                                                                                                                  | AT1G54790            | GDSL-motif lipase/hydrolase family protein                                                                                                                                                                               | Metabolism |
| GmaAffx.11815.1.S1_at   | 0.000518941 | 3.03525 | AW311637 | Methyltransferase [Prunus armeniaca (Apricot)]                                                                                                                                                                                                                  | 0                    | 0                                                                                                                                                                                                                        | Metabolism |
| GmaAffx.1301.90.S1_s_at | 1.59037E-05 | 4.2662  | BU764871 | CPRD49 protein [Vigna unguiculata (Cowpea)]                                                                                                                                                                                                                     | AT3G11210            | GDSL-motif lipase/hydrolase family protein                                                                                                                                                                               | Metabolism |
| GmaAffx.15940.1.S1_at   | 0.000452343 | 2.02141 | AI522941 | Acid beta-fructofuranosidase precursor (EC 3.2.1.26) (Acid sucrose hydrolase) (Acid invertase) (AI) (Vacuolar invertase) [Contains: Acid beta-fructofuranosidase 30 kDa subunit; Acid beta-fructofuranosidase 38 kDa subunit] [Phaseolus aureus (Mung bean) (Vi | AT1G12240            | ATBETAFRUCT4/VAC-INV (VACUOLAR INVERTASE); beta-fructofuranosidase/ hydrolase, hydrolyzing O-glycosyl compounds                                                                                                          | Metabolism |
| GmaAffx.16966.1.S1_at   | 0.00621704  | 2.77424 | BG882760 | Putative metallophosphatase [Lupinus luteus (European yellow lupin)]                                                                                                                                                                                            | AT5G50400            | ATPAP27/PAP27 (purple acid phosphatase 27); acid phosphatase/ protein serine/threonine phosphatase                                                                                                                       | Metabolism |
| GmaAffx.18905.1.S1_at   | 0.000292466 | 3.19093 | BM523606 | CXE carboxylesterase [Malus pumila]                                                                                                                                                                                                                             | AT5G06570            | similar to unknown protein [Arabidopsis thaliana] (TAIR:AT5G16080.1); similar to CXE carboxylesterase [Actinidia deliciosa] (GB:ABB89016.1); contains InterPro domain Esterase/lipase/thioesterase; (InterPro:IPR000379) | Metabolism |
| GmaAffx.19096.1.S1_at   | 0.000127034 | 2.02583 | BM522826 | Cytochrome P450 71D8 [Glycine max (Soybean)]                                                                                                                                                                                                                    | 0                    | CYP71A23 (cytochrome P450, family 71, subfamily A, polypeptide 23); oxygen binding                                                                                                                                       | Metabolism |
| GmaAffx.19831.1.S1_at   | 0.000196569 | 2.02337 | BU549972 | Cytochrome P450 monooxygenase CYP716A12 [Medicago truncatula (Barrel medic)]                                                                                                                                                                                    | AT5G36130; AT5G36110 | [AT5G36130, cytochrome P450 family];[AT5G36110, CYP716A1 (cytochrome P450, family 716, subfamily A, polypeptide 1); oxygen binding]                                                                                      | Metabolism |

|                         |             |         |          |                                                                                            |                         |                                                                                                                                                                                                                                                                     |            |
|-------------------------|-------------|---------|----------|--------------------------------------------------------------------------------------------|-------------------------|---------------------------------------------------------------------------------------------------------------------------------------------------------------------------------------------------------------------------------------------------------------------|------------|
| GmaAffx.21595.1.S1_at   | 0.00964574  | 2.60094 | BE059253 | Aldehyde dehydrogenase [Medicago truncatula (Barrel medic)]                                | AT4G34131;<br>AT4G34135 | [AT4G34131, UGT73B3 (UDP-glucosyl transferase 73B3); UDP-glycosyltransferase/ abscisic acid glucosyltransferase/ transferase, transferring hexosyl groups];[AT4G34135, UGT73B2; UDP-glucosyltransferase/ UDP-glycosyltransferase/ flavonol 3-O-glucosyltransferase] | Metabolism |
| GmaAffx.21753.1.S1_at   | 0.0126527   | 2.02138 | CA784528 | Isopentenyl transferase [Glycine max (Soybean)]                                            | AT5G19040               | ATIPT5 (Arabidopsis thaliana isopentenyltransferase 5); transferase, transferring alkyl or aryl (other than methyl) groups                                                                                                                                          | Metabolism |
| GmaAffx.23311.1.A1_at   | 0.00760111  | 2.4733  | BI969379 | L-galactose-1-phosphate phosphatase [Actinidia deliciosa (Kiwi)]                           | AT3G02870               | VTC4; 3'(2'),5'-bisphosphate nucleotidase/ inositol or phosphatidylinositol phosphatase                                                                                                                                                                             | Metabolism |
| GmaAffx.2475.1.S1_at    | 0.0094571   | 2.40776 | AW100779 | NA                                                                                         | AT1G77240               | AMP-binding protein, putative                                                                                                                                                                                                                                       | Metabolism |
| GmaAffx.26533.1.A1_s_at | 0.0166872   | 3.3147  | BE659836 | Hypothetical protein AT4g28940 [Arabidopsis thaliana (Mouse-ear cress)]                    | AT4G28940               | catalytic                                                                                                                                                                                                                                                           | Metabolism |
| GmaAffx.27192.1.S1_at   | 3.74894E-05 | 2.02721 | BE823286 | TK1-like deoxyribonucleoside kinase [Lycopersicon esculentum (Tomato)]                     | AT3G07800               | thymidine kinase, putative                                                                                                                                                                                                                                          | Metabolism |
| GmaAffx.28120.1.S1_at   | 7.08356E-05 | 2.32216 | BM143646 | Flavonoid 3-O-galactosyl transferase [Vigna mungo (Rice bean) (Black gram)]                | AT5G17050               | UDP-glucuronosyl/UDP-glucosyl transferase family protein                                                                                                                                                                                                            | Metabolism |
| GmaAffx.28539.1.S1_at   | 0.00214091  | 2.12078 | BQ080184 | Similar to latex allergen from Hevea brasiliensis [Arabidopsis thaliana (Mouse-ear cress)] | AT2G39220               | PLA IIB/PLP6 (Patatin-like protein 6); nutrient reservoir                                                                                                                                                                                                           | Metabolism |
| GmaAffx.32023.1.S1_at   | 0.0139643   | 2.72734 | BG046495 | MtN21 protein [Medicago truncatula (Barrel medic)]                                         | AT5G07050               | nodulin MtN21 family protein                                                                                                                                                                                                                                        | Metabolism |
| GmaAffx.33147.1.S1_at   | 0.00455389  | 3.44072 | BQ452965 | Cytochrome P-450 [Phalaenopsis sp. SM9108]                                                 | AT1G74110               | CYP78A10 (cytochrome P450, family 78, subfamily A, polypeptide 10); oxygen binding                                                                                                                                                                                  | Metabolism |
| GmaAffx.33480.1.A1_at   | 0.0144548   | 2.03103 | BU551196 | Putative phosphoribosylanthranilate transferase [Arabidopsis thaliana (Mouse-ear cress)]   | AT3G03680               | C2 domain-containing protein                                                                                                                                                                                                                                        | Metabolism |
| GmaAffx.33611.1.S1_at   | 8.42059E-05 | 2.63663 | BU765780 | E-class P450, group I [Medicago truncatula (Barrel medic)]                                 | AT2G42247;<br>AT2G42250 | [AT2G42250, CYP712A1 (cytochrome P450, family 712, subfamily A, polypeptide 1); oxygen binding]                                                                                                                                                                     | Metabolism |
| GmaAffx.34785.21.S1_at  | 4.19589E-06 | 5.16698 | CA799146 | F4H5.9 protein [Arabidopsis thaliana (Mouse-ear cress)]                                    | AT1G06830               | glutaredoxin family protein                                                                                                                                                                                                                                         | Metabolism |
| GmaAffx.3526.1.S1_at    | 0.000984765 | 4.82693 | BE658646 | Apyrase GS50 [Glycine soja (Wild soybean)]                                                 | 0                       | 0                                                                                                                                                                                                                                                                   | Metabolism |
| GmaAffx.3702.1.S1_at    | 0.0136128   | 2.45352 | BE821030 | Hypothetical protein F28O9.250 [Arabidopsis thaliana (Mouse-ear cress)]                    | 0                       | 0                                                                                                                                                                                                                                                                   | Metabolism |
| GmaAffx.37316.1.S1_at   | 0.000436851 | 2.30726 | AW733720 | NA                                                                                         | AT5G20740               | invertase/pectin methylesterase inhibitor family protein                                                                                                                                                                                                            | Metabolism |
| GmaAffx.37484.1.S1_at   | 2.69545E-05 | 2.12908 | BG651852 | Hypothetical protein F15G16.140 [Arabidopsis thaliana (Mouse-ear cress)]                   | 0                       | auxin-responsive protein -related                                                                                                                                                                                                                                   | Metabolism |
| GmaAffx.37484.2.S1_at   | 0.00860109  | 2.73352 | BQ629925 | Hypothetical protein OJ1214 E03.7 [Oryza sativa (japonica cultivar-group)]                 | 0                       | auxin-responsive protein -related                                                                                                                                                                                                                                   | Metabolism |

|                         |             |         |          |                                                                                                                  |                         |                                                                                                                                                                                                                       |            |
|-------------------------|-------------|---------|----------|------------------------------------------------------------------------------------------------------------------|-------------------------|-----------------------------------------------------------------------------------------------------------------------------------------------------------------------------------------------------------------------|------------|
| GmaAffx.377.1.S1_at     | 1.53853E-06 | 2.48852 | BE822954 | Mevalonate kinase/phosphomevalonate kinase [Medicago truncatula (Barrel medic)]                                  | AT5G27450               | MK/MVK; mevalonate kinase                                                                                                                                                                                             | Metabolism |
| GmaAffx.40069.1.A1_at   | 0.0125783   | 2.71752 | BE658613 | AMP-dependent synthetase and ligase [Medicago truncatula (Barrel medic)]                                         | AT3G23790               | AMP-binding protein, putative                                                                                                                                                                                         | Metabolism |
| GmaAffx.40972.1.S1_at   | 0.0012042   | 2.01995 | BQ453416 | Short-chain dehydrogenase/reductase SDR [Medicago truncatula (Barrel medic)]                                     | AT3G26760               | short-chain dehydrogenase/reductase (SDR) family protein                                                                                                                                                              | Metabolism |
| GmaAffx.41338.1.A1_at   | 0.0048453   | 2.81562 | BU550133 | Cytochrome P450 monooxygenase CYP716A12 [Medicago truncatula (Barrel medic)]                                     | AT5G36130;<br>AT5G36110 | [AT5G36130, cytochrome P450 family];[AT5G36110, CYP716A1 (cytochrome P450, family 716, subfamily A, polypeptide 1); oxygen binding]                                                                                   | Metabolism |
| GmaAffx.43208.1.A1_at   | 0.000668289 | 2.54817 | CD412962 | NA                                                                                                               | AT3G29670               | transferase family protein                                                                                                                                                                                            | Metabolism |
| GmaAffx.45841.1.S1_at   | 9.08243E-09 | 2.08353 | BI702220 | Isoflavone reductase homolog [Lupinus albus (White lupin)]                                                       | AT1G32100               | pinoresinol-lariciresinol reductase, putative                                                                                                                                                                         | Metabolism |
| GmaAffx.4604.1.S1_at    | 4.60831E-05 | 2.39233 | BI426477 | Glucosyltransferase [Ipomoea purpurea (Common morning glory) (Pharbitis purpurea)]                               | AT5G54010               | glycosyltransferase family protein                                                                                                                                                                                    | Metabolism |
| GmaAffx.46344.2.S1_s_at | 0.0023128   | 2.58344 | BQ629356 | Phosphoserine phosphatase, chloroplast precursor [Arabidopsis thaliana (Mouse-ear cress)]                        | 0                       | 0                                                                                                                                                                                                                     | Metabolism |
| GmaAffx.47583.1.S1_at   | 0.00424254  | 2.49802 | CA853439 | E-class P450, group I [Medicago truncatula (Barrel medic)]                                                       | AT4G36220               | FAH1 (FERULATE-5-HYDROXYLASE 1); ferulate 5-hydroxylase                                                                                                                                                               | Metabolism |
| GmaAffx.50360.1.S1_at   | 0.000135029 | 2.01439 | BM309759 | CXE carboxylesterase [Actinidia arguta]                                                                          | AT5G62180               | similar to unknown protein [Arabidopsis thaliana] (TAIR:AT2G45600.1); similar to CXE carboxylesterase [Actinidia arguta] (GB:ABB89014.1); contains InterPro domain Esterase/lipase/thioesterase; (InterPro:IPR000379) | Metabolism |
| GmaAffx.50571.1.S1_s_at | 6.53649E-05 | 2.18452 | BI943299 | Cytochrome P450 monooxygenase CYP78F1 [Medicago truncatula (Barrel medic)]                                       | AT3G61880               | CYP78A9 (CYTOCHROME P450 78A9); oxygen binding                                                                                                                                                                        | Metabolism |
| GmaAffx.51505.1.S1_at   | 0.0117407   | 2.22647 | BE611553 | Putative acetone-cyanohydrin lyase [Arabidopsis thaliana (Mouse-ear cress)]                                      | 0                       | ACL (ACETONE-CYANOHYDRIN LYASE); hydrolase                                                                                                                                                                            | Metabolism |
| GmaAffx.57896.2.S1_at   | 0.000493848 | 2.6375  | AW830233 | E-class P450, group I [Medicago truncatula (Barrel medic)]                                                       | AT3G26230               | CYP71B24 (cytochrome P450, family 71, subfamily B, polypeptide 24); oxygen binding                                                                                                                                    | Metabolism |
| GmaAffx.61867.1.S1_at   | 0.00181317  | 2.76492 | AW101682 | Phenol hydroxylase reductase; Ferric reductase-like transmembrane component [Medicago truncatula (Barrel medic)] | 0                       | FRO2 (FERRIC REDUCTION OXIDASE 2); ferric-chelate reductase                                                                                                                                                           | Metabolism |
| GmaAffx.62309.1.S1_at   | 0.000659327 | 2.4525  | AW704333 | Inositol polyphosphate related phosphatase [Medicago truncatula (Barrel medic)]                                  | AT2G01900               | endonuclease/exonuclease/phosphatase family protein                                                                                                                                                                   | Metabolism |
| GmaAffx.66451.1.S1_at   | 2.72993E-05 | 2.33818 | AW309198 | Galactose-binding like; Alpha-L-arabinofuranosidase, C-terminal [Medicago truncatula (Barrel medic)]             | AT5G26120               | glycosyl hydrolase family protein 51                                                                                                                                                                                  | Metabolism |
| GmaAffx.66649.1.S1_at   | 0.00164613  | 2.48088 | CA819378 | SAM (And some other nucleotide) binding motif [Medicago truncatula (Barrel medic)]                               | AT1G48600               | phosphoethanolamine N-methyltransferase 2, putative (NMT2)                                                                                                                                                            | Metabolism |
| GmaAffx.68419.1.S1_at   | 0.000176649 | 2.44177 | BI425574 | Hypothetical protein [Medicago truncatula (Barrel medic)]                                                        | AT3G28050               | nodulin MtN21 family protein                                                                                                                                                                                          | Metabolism |

|                         |             |         |          |                                                                                          |           |                                                                                                                                                       |            |
|-------------------------|-------------|---------|----------|------------------------------------------------------------------------------------------|-----------|-------------------------------------------------------------------------------------------------------------------------------------------------------|------------|
| GmaAffx.69328.1.S1_at   | 0.0167255   | 5.40235 | BM891265 | PREDICTED: similar to CG6084-PA, isoform A [Tribolium castaneum]                         | 0         | mannose 6-phosphate reductase (NADPH-dependent), putative                                                                                             | Metabolism |
| GmaAffx.72212.1.A1_at   | 0.000123247 | 2.06852 | BE824300 | Glucosyltransferase [Ipomoea purpurea (Common morning glory) (Pharbitis purpurea)]       | AT1G64920 | glycosyltransferase family protein                                                                                                                    | Metabolism |
| GmaAffx.72986.1.S1_at   | 0.00198784  | 2.16334 | BI317536 | Inositol polyphosphate related phosphatase [Medicago truncatula (Barrel                  | AT2G01900 | endonuclease/exonuclease/ phosphatase family protein                                                                                                  | Metabolism |
| GmaAffx.73241.1.S1_at   | 0.000381389 | 2.15476 | BM188470 | Similarity to endo-beta-N-acetylglucosaminidase [Arabidopsis thaliana (Mouse-ear cress)] | AT5G05460 | hydrolase, acting on glycosyl bonds                                                                                                                   | Metabolism |
| GmaAffx.73653.1.S1_at   | 0.00196822  | 2.16258 | BE211623 | Cytochrome P450 [Petunia hybrida (Petunia)]                                              | AT3G61040 | CYP76C7 (cytochrome P450, family 76, subfamily C, polypeptide 7); oxygen binding                                                                      | Metabolism |
| GmaAffx.74009.1.S1_at   | 0.0129326   | 2.25089 | BM093331 | UDP-glucosyltransferase HRA25 [Phaseolus vulgaris (Kidney bean) (French bean)]           | AT3G02100 | UDP-glucuronosyl/UDP-glucosyl transferase family protein                                                                                              | Metabolism |
| GmaAffx.77438.1.A1_at   | 0.00861376  | 6.19412 | AW831599 | Phosphonopyruvate decarboxylase-like protein [Arabidopsis thaliana (Mouse-ear cress)]    | 0         | 2,3-biphosphoglycerate-independent phosphoglycerate mutase-related / phosphoglyceromutase-related                                                     | Metabolism |
| GmaAffx.79229.1.S1_at   | 0.00113127  | 2.00074 | CA800208 | Hypothetical protein T17J13.120 [Arabidopsis thaliana (Mouse-ear cress)]                 | AT3G62160 | transferase family protein                                                                                                                            | Metabolism |
| GmaAffx.79891.1.S1_at   | 0.000469989 | 4.73411 | AI988440 | Putative cytochrome P450 monooxygenase [Cicer arietinum (Chickpea) (Garbanzo)]           | AT2G02580 | CYP71B9 (cytochrome P450, family 71, subfamily B, polypeptide 9); oxygen binding                                                                      | Metabolism |
| GmaAffx.80249.1.S1_at   | 0.0040857   | 2.32335 | AW397976 | Probable rhamnose biosynthetic enzyme 2 [Arabidopsis thaliana (Mouse-ear                 | AT3G14790 | RHM3 (RHAMNOSE BIOSYNTHESIS 3); catalytic                                                                                                             | Metabolism |
| GmaAffx.80904.1.A1_s_at | 0.00328813  | 4.41031 | BE583523 | NA                                                                                       | AT5G62530 | ALDH12A1 (Aldehyde dehydrogenase 12A1); 1-pyrroline-5-carboxylate dehydrogenase/ 3-chloroallyl aldehyde dehydrogenase                                 | Metabolism |
| GmaAffx.81018.1.A1_at   | 3.94856E-05 | 2.47546 | BE657998 | Alpha-1,4-glucan-protein synthase [UDP-forming] [Pisum sativum (Garden pea)]             | 0         | 0                                                                                                                                                     | Metabolism |
| GmaAffx.81287.1.S1_at   | 0.0013117   | 3.18949 | BG789983 | O-methyltransferase [Prunus dulcis (Almond) (Prunus amygdalus)]                          | 0         | O-methyltransferase family 2 protein                                                                                                                  | Metabolism |
| GmaAffx.81584.1.S1_at   | 6.64826E-08 | 2.42331 | BI426969 | NA                                                                                       | AT4G37150 | esterase, putative                                                                                                                                    | Metabolism |
| GmaAffx.82528.1.S1_at   | 0.000159215 | 2.46999 | CA800460 | Putative adenosylhomocysteinase [Medicago sativa (Alfalfa)]                              | AT5G16250 | similar to unknown protein [Arabidopsis thaliana] (TAIR:AT3G02640.1); similar to conserved hypothetical protein [Medicago truncatula] (GB:ABE78001.1) | Metabolism |
| GmaAffx.82528.2.S1_at   | 0.000884804 | 2.24632 | BI702248 | Putative adenosylhomocysteinase [Medicago sativa (Alfalfa)]                              | AT5G16250 | similar to unknown protein [Arabidopsis thaliana] (TAIR:AT3G02640.1); similar to conserved hypothetical protein [Medicago truncatula] (GB:ABE78001.1) | Metabolism |
| GmaAffx.82528.2.S1_s_at | 7.34402E-05 | 2.30075 | BI702248 | Putative adenosylhomocysteinase [Medicago sativa (Alfalfa)]                              | AT5G16250 | similar to unknown protein [Arabidopsis thaliana] (TAIR:AT3G02640.1); similar to conserved hypothetical protein [Medicago truncatula] (GB:ABE78001.1) | Metabolism |

|                         |             |         |          |                                                                                                   |           |                                                                                                                                               |                               |
|-------------------------|-------------|---------|----------|---------------------------------------------------------------------------------------------------|-----------|-----------------------------------------------------------------------------------------------------------------------------------------------|-------------------------------|
| GmaAffx.82887.1.S1_at   | 8.74651E-05 | 2.18585 | BI973946 | Probable rhamnose biosynthetic enzyme 1 [Arabidopsis thaliana (Mouse-ear cress)]                  | AT1G78570 | RHM1/ROL1 (RHAMNOSE BIOSYNTHESIS1); UDP-glucose 4,6-dehydratase/ catalytic                                                                    | Metabolism                    |
| GmaAffx.8328.1.S1_at    | 0.00020746  | 2.63754 | AW831983 | Generic methyltransferase [Medicago truncatula (Barrel medic)]                                    | AT2G45750 | dehydration-responsive family protein                                                                                                         | Metabolism                    |
| GmaAffx.84418.1.S1_at   | 0.000142842 | 3.36777 | BQ576552 | Nodulin-like protein [Arabidopsis thaliana (Mouse-ear cress)]                                     | AT4G08290 | nodulin MtN21 family protein                                                                                                                  | Metabolism                    |
| GmaAffx.84946.1.S1_s_at | 0.00350102  | 2.10993 | BM523917 | Glyoxal oxidase [Vitis pseudoreticulata]                                                          | AT3G53950 | glyoxal oxidase-related                                                                                                                       | Metabolism                    |
| GmaAffx.85662.2.S1_at   | 0.00256943  | 2.21608 | AI496432 | Hypothetical protein F15G16.140 [Arabidopsis thaliana (Mouse-ear cress)]                          | 0         | auxin-responsive protein -related                                                                                                             | Metabolism                    |
| GmaAffx.86766.1.S1_at   | 3.36643E-05 | 2.33196 | CA820659 | Hypothetical protein [Medicago truncatula (Barrel medic)]                                         | AT1G68170 | nodulin MtN21 family protein                                                                                                                  | Metabolism                    |
| GmaAffx.87031.1.S1_at   | 0.000550399 | 2.05463 | AW507869 | L-ascorbate oxidase precursor [Medicago truncatula (Barrel medic)]                                | AT5G21105 | L-ascorbate oxidase/ copper ion binding                                                                                                       | Metabolism                    |
| GmaAffx.87441.1.S1_at   | 5.43325E-05 | 2.17616 | BQ273031 | UDP-glucose glucosyltransferase [Medicago truncatula (Barrel medic)]                              | 0         | UGT73B3 (UDP-glucosyl transferase 73B3); UDP-glycosyltransferase/ abscisic acid glucosyltransferase/ transferase, transferring hexosyl groups | Metabolism                    |
| GmaAffx.87888.1.S1_s_at | 5.08991E-05 | 2.13703 | BU578170 | NA                                                                                                | AT3G17130 | invertase/pectin methylesterase inhibitor family protein                                                                                      | Metabolism                    |
| GmaAffx.9102.1.S1_at    | 0.0034028   | 2.17852 | BI971064 | Lipoxygenase [Medicago truncatula (Barrel medic)]                                                 | AT1G55020 | LOX1 (Lipoxygenase 1); lipoxygenase                                                                                                           | Metabolism                    |
| GmaAffx.91115.1.S1_at   | 0.00219045  | 2.34063 | CF806840 | Glyoxal oxidase [Vitis pseudoreticulata]                                                          | AT3G53950 | glyoxal oxidase-related                                                                                                                       | Metabolism                    |
| GmaAffx.91817.1.S1_at   | 0.0120981   | 4.38231 | CF807542 | Galactose mutarotase-like [Medicago truncatula (Barrel medic)]                                    | AT5G15140 | aldose 1-epimerase family protein                                                                                                             | Metabolism                    |
| GmaAffx.93221.1.S1_s_at | 1.18629E-05 | 2.18473 | CF808946 | O-methyltransferase, family 2 [Medicago truncatula (Barrel medic)]                                | 0         | O-methyltransferase family 2 protein                                                                                                          | Metabolism                    |
| GmaAffx.9437.1.S1_at    | 0.000217959 | 2.29671 | BI942964 | S-adenosylmethionine synthetase 3 [Catharanthus roseus (Rosy periwinkle) (Madagascar periwinkle)] | AT1G02500 | SAM1 (S-adenosylmethionine synthetase 1); methionine adenosyltransferase                                                                      | Metabolism                    |
| Gma.10234.1.S1_at       | 0.000127544 | 2.88406 | BE023458 | NA                                                                                                | 0         | 0                                                                                                                                             | No Homology to Known Proteins |
| Gma.12949.1.A1_at       | 0.00373568  | 2.12527 | CD411827 | NA                                                                                                | 0         | 0                                                                                                                                             | No Homology to Known Proteins |
| Gma.13218.1.A1_s_at     | 0.0010172   | 2.04394 | CD391892 | NA                                                                                                | 0         | 0                                                                                                                                             | No Homology to Known Proteins |
| Gma.13485.1.A1_at       | 0.00280427  | 3.67309 | CD398890 | NA                                                                                                | 0         | 0                                                                                                                                             | No Homology to Known Proteins |
| Gma.14318.1.S1_at       | 0.000287515 | 2.4869  | CA852942 | NA                                                                                                | 0         | 0                                                                                                                                             | No Homology to Known Proteins |
| Gma.15881.1.A1_at       | 0.00491024  | 2.03837 | CD400159 | NA                                                                                                | 0         | 0                                                                                                                                             | No Homology to Known Proteins |
| Gma.15993.1.A1_at       | 0.00105921  | 2.42213 | BG237670 | NA                                                                                                | 0         | 0                                                                                                                                             | No Homology to Known Proteins |
| Gma.16139.1.S1_at       | 0.00194872  | 2.42011 | CD402105 | NA                                                                                                | 0         | 0                                                                                                                                             | No Homology to Known Proteins |
| Gma.17231.1.A1_at       | 0.000197224 | 4.22293 | AW309582 | NA                                                                                                | 0         | 0                                                                                                                                             | No Homology to Known Proteins |
| Gma.17957.1.S1_at       | 0.0145657   | 2.05372 | AW760876 | NA                                                                                                | 0         | 0                                                                                                                                             | No Homology to Known Proteins |

|                         |             |         |          |    |   |   |                               |
|-------------------------|-------------|---------|----------|----|---|---|-------------------------------|
| Gma.357.1.A1_at         | 0.0013379   | 2.01047 | AW348892 | NA | 0 | 0 | No Homology to Known Proteins |
| Gma.368.1.S1_at         | 0.00339802  | 2.48504 | AW349594 | NA | 0 | 0 | No Homology to Known Proteins |
| Gma.3965.1.S1_at        | 1.27158E-05 | 3.36051 | BE821339 | NA | 0 | 0 | No Homology to Known Proteins |
| Gma.5399.1.A1_at        | 0.00830436  | 2.00448 | CD402231 | NA | 0 | 0 | No Homology to Known Proteins |
| Gma.6139.1.S1_at        | 0.000139443 | 2.16321 | CD390793 | NA | 0 | 0 | No Homology to Known Proteins |
| Gma.6416.1.S1_at        | 9.64576E-05 | 2.37892 | BM139646 | NA | 0 | 0 | No Homology to Known Proteins |
| Gma.677.1.S1_at         | 0.0064878   | 2.37862 | BU082252 | NA | 0 | 0 | No Homology to Known Proteins |
| Gma.786.1.A1_at         | 0.00110028  | 5.41491 | BE820386 | NA | 0 | 0 | No Homology to Known Proteins |
| Gma.8048.1.S1_at        | 0.000133916 | 2.25929 | BG511047 | NA | 0 | 0 | No Homology to Known Proteins |
| Gma.8594.1.S1_at        | 0.00546731  | 3.36555 | BU760779 | NA | 0 | 0 | No Homology to Known Proteins |
| Gma.9036.1.S1_at        | 2.31799E-06 | 2.32052 | AW309501 | NA | 0 | 0 | No Homology to Known Proteins |
| Gma.9966.1.S1_at        | 0.00771673  | 2.02902 | CD396068 | NA | 0 | 0 | No Homology to Known Proteins |
| GmaAffx.10340.1.S1_s_at | 0.00984319  | 2.59025 | CA938421 | NA | 0 | 0 | No Homology to Known Proteins |
| GmaAffx.11214.1.A1_at   | 0.00235835  | 2.21949 | CD413632 | NA | 0 | 0 | No Homology to Known Proteins |
| GmaAffx.11297.1.S1_at   | 2.5971E-06  | 2.04867 | BI967760 | NA | 0 | 0 | No Homology to Known Proteins |
| GmaAffx.12519.1.S1_at   | 7.02111E-06 | 2.24942 | BU080591 | NA | 0 | 0 | No Homology to Known Proteins |
| GmaAffx.12723.1.A1_at   | 0.000470598 | 6.35926 | BE658883 | NA | 0 | 0 | No Homology to Known Proteins |
| GmaAffx.15362.1.S1_at   | 0.000950689 | 2.10717 | BU926414 | NA | 0 | 0 | No Homology to Known Proteins |
| GmaAffx.16092.1.A1_at   | 0.000120542 | 2.13969 | BE658167 | NA | 0 | 0 | No Homology to Known Proteins |
| GmaAffx.16437.1.A1_at   | 0.00106796  | 2.35877 | AW349866 | NA | 0 | 0 | No Homology to Known Proteins |
| GmaAffx.1859.1.A1_at    | 0.016302    | 2.19089 | BU549902 | NA | 0 | 0 | No Homology to Known Proteins |
| GmaAffx.18649.1.S1_at   | 0.0153896   | 2.08668 | AW351025 | NA | 0 | 0 | No Homology to Known Proteins |
| GmaAffx.24530.1.S1_at   | 0.0167466   | 2.28276 | BU762196 | NA | 0 | 0 | No Homology to Known Proteins |
| GmaAffx.27508.1.S1_at   | 0.00110315  | 4.9673  | BI315773 | NA | 0 | 0 | No Homology to Known Proteins |
| GmaAffx.27581.1.S1_at   | 2.19054E-05 | 2.25049 | CD414601 | NA | 0 | 0 | No Homology to Known Proteins |
| GmaAffx.28689.1.S1_at   | 0.00531001  | 2.08962 | BQ610782 | NA | 0 | 0 | No Homology to Known Proteins |

|                         |             |         |          |    |   |   |                               |
|-------------------------|-------------|---------|----------|----|---|---|-------------------------------|
| GmaAffx.30176.1.A1_at   | 0.00563407  | 2.33176 | CD417988 | NA | 0 | 0 | No Homology to Known Proteins |
| GmaAffx.310.1.S1_at     | 0.00522693  | 2.05526 | AW458428 | NA | 0 | 0 | No Homology to Known Proteins |
| GmaAffx.31311.1.S1_at   | 0.000770496 | 2.36164 | BI970399 | NA | 0 | 0 | No Homology to Known Proteins |
| GmaAffx.36823.1.S1_at   | 0.000740925 | 2.31888 | BI967614 | NA | 0 | 0 | No Homology to Known Proteins |
| GmaAffx.37221.1.S1_at   | 0.00127179  | 2.10356 | BM523361 | NA | 0 | 0 | No Homology to Known Proteins |
| GmaAffx.41990.1.S1_at   | 6.09011E-05 | 2.17972 | CA936708 | NA | 0 | 0 | No Homology to Known Proteins |
| GmaAffx.42417.1.S1_at   | 0.00345275  | 2.99937 | BE611786 | NA | 0 | 0 | No Homology to Known Proteins |
| GmaAffx.43784.1.A1_s_at | 5.23362E-05 | 2.00181 | AW350840 | NA | 0 | 0 | No Homology to Known Proteins |
| GmaAffx.4508.1.S1_at    | 0.0130478   | 2.09929 | BI316036 | NA | 0 | 0 | No Homology to Known Proteins |
| GmaAffx.45755.1.S1_at   | 0.00980368  | 2.17519 | BI470908 | NA | 0 | 0 | No Homology to Known Proteins |
| GmaAffx.45991.1.A1_at   | 8.27217E-05 | 2.3342  | BI969588 | NA | 0 | 0 | No Homology to Known Proteins |
| GmaAffx.45999.1.A1_at   | 0.00110648  | 2.24693 | BI969944 | NA | 0 | 0 | No Homology to Known Proteins |
| GmaAffx.47744.1.A1_at   | 2.24009E-05 | 2.11407 | CD401867 | NA | 0 | 0 | No Homology to Known Proteins |
| GmaAffx.48416.1.S1_at   | 0.00954002  | 2.73209 | AW318337 | NA | 0 | 0 | No Homology to Known Proteins |
| GmaAffx.50999.1.S1_at   | 0.00190615  | 2.93303 | AW509187 | NA | 0 | 0 | No Homology to Known Proteins |
| GmaAffx.51463.1.S1_at   | 0.0014568   | 3.04263 | BE659841 | NA | 0 | 0 | No Homology to Known Proteins |
| GmaAffx.5272.1.S1_at    | 0.000869998 | 2.48204 | BM522624 | NA | 0 | 0 | No Homology to Known Proteins |
| GmaAffx.53121.1.A1_at   | 1.78099E-05 | 2.07845 | BE820032 | NA | 0 | 0 | No Homology to Known Proteins |
| GmaAffx.54537.1.S1_at   | 0.000986107 | 2.18685 | BG551770 | NA | 0 | 0 | No Homology to Known Proteins |
| GmaAffx.55928.1.S1_at   | 0.0166232   | 2.06929 | BQ612397 | NA | 0 | 0 | No Homology to Known Proteins |
| GmaAffx.56672.1.S1_at   | 0.000704607 | 9.30944 | CB063595 | NA | 0 | 0 | No Homology to Known Proteins |
| GmaAffx.58518.1.A1_at   | 0.00564482  | 4.6987  | BE820428 | NA | 0 | 0 | No Homology to Known Proteins |
| GmaAffx.59486.1.S1_at   | 0.000406688 | 4.18728 | BI471586 | NA | 0 | 0 | No Homology to Known Proteins |
| GmaAffx.59971.1.S1_at   | 0.0124067   | 4.25506 | BM177559 | NA | 0 | 0 | No Homology to Known Proteins |
| GmaAffx.6000.1.A1_at    | 0.00150827  | 3.45645 | BU549774 | NA | 0 | 0 | No Homology to Known Proteins |
| GmaAffx.60846.1.A1_at   | 0.0148787   | 2.97343 | BU550268 | NA | 0 | 0 | No Homology to Known Proteins |

|                         |             |         |          |    |   |   |                               |
|-------------------------|-------------|---------|----------|----|---|---|-------------------------------|
| GmaAffx.60949.1.S1_at   | 0.0010799   | 2.75577 | BU763299 | NA | 0 | 0 | No Homology to Known Proteins |
| GmaAffx.61526.1.A1_s_at | 0.00998914  | 2.39038 | CD417915 | NA | 0 | 0 | No Homology to Known Proteins |
| GmaAffx.62017.1.S1_at   | 0.0155725   | 3.59733 | AW278559 | NA | 0 | 0 | No Homology to Known Proteins |
| GmaAffx.6302.1.S1_at    | 0.000357569 | 2.77094 | CA801413 | NA | 0 | 0 | No Homology to Known Proteins |
| GmaAffx.64250.1.A1_at   | 0.00638959  | 3.31674 | BI967675 | NA | 0 | 0 | No Homology to Known Proteins |
| GmaAffx.65566.1.A1_at   | 0.00897138  | 5.29732 | CA785452 | NA | 0 | 0 | No Homology to Known Proteins |
| GmaAffx.66587.1.S1_at   | 0.000920814 | 2.00937 | AW432768 | NA | 0 | 0 | No Homology to Known Proteins |
| GmaAffx.66986.1.S1_at   | 0.000671663 | 2.19805 | BI970793 | NA | 0 | 0 | No Homology to Known Proteins |
| GmaAffx.69470.1.S1_at   | 0.00511029  | 2.03976 | BE803881 | NA | 0 | 0 | No Homology to Known Proteins |
| GmaAffx.70540.1.A1_at   | 0.00727855  | 5.0674  | CD409006 | NA | 0 | 0 | No Homology to Known Proteins |
| GmaAffx.71084.1.S1_at   | 0.000135428 | 2.07567 | AW311116 | NA | 0 | 0 | No Homology to Known Proteins |
| GmaAffx.73005.1.S1_at   | 0.00900279  | 2.05139 | BI321220 | NA | 0 | 0 | No Homology to Known Proteins |
| GmaAffx.75079.1.A1_at   | 0.00252922  | 2.32316 | CD404293 | NA | 0 | 0 | No Homology to Known Proteins |
| GmaAffx.75247.1.S1_at   | 0.00635648  | 6.44793 | AI748250 | NA | 0 | 0 | No Homology to Known Proteins |
| GmaAffx.768.1.A1_at     | 0.00147998  | 8.59958 | BE821548 | NA | 0 | 0 | No Homology to Known Proteins |
| GmaAffx.76964.1.S1_at   | 0.00587084  | 3.77259 | BU577127 | NA | 0 | 0 | No Homology to Known Proteins |
| GmaAffx.78787.1.S1_at   | 0.0168538   | 3.81853 | CA938386 | NA | 0 | 0 | No Homology to Known Proteins |
| GmaAffx.79321.1.S1_at   | 0.00583871  | 2.48375 | CA850892 | NA | 0 | 0 | No Homology to Known Proteins |
| GmaAffx.79963.1.S1_at   | 0.00320399  | 2.21214 | BG362727 | NA | 0 | 0 | No Homology to Known Proteins |
| GmaAffx.80099.1.S1_at   | 0.000211308 | 3.33284 | BQ298229 | NA | 0 | 0 | No Homology to Known Proteins |
| GmaAffx.81947.1.S1_at   | 0.00032969  | 2.03898 | BE609705 | NA | 0 | 0 | No Homology to Known Proteins |
| GmaAffx.8248.1.S1_at    | 0.000625367 | 2.35108 | BI426579 | NA | 0 | 0 | No Homology to Known Proteins |
| GmaAffx.82574.1.S1_at   | 0.0104627   | 2.82687 | BE806391 | NA | 0 | 0 | No Homology to Known Proteins |
| GmaAffx.84445.1.S1_at   | 0.00018297  | 2.58507 | AI974106 | NA | 0 | 0 | No Homology to Known Proteins |
| GmaAffx.85440.1.A1_at   | 0.0116542   | 3.46879 | BM731559 | NA | 0 | 0 | No Homology to Known Proteins |
| GmaAffx.85650.1.S1_at   | 0.00132984  | 2.02929 | BQ473221 | NA | 0 | 0 | No Homology to Known Proteins |

|                         |             |         |          |                                                                                                                                                                                                                                                                 |           |                                                                                                                                                                                                        |                               |
|-------------------------|-------------|---------|----------|-----------------------------------------------------------------------------------------------------------------------------------------------------------------------------------------------------------------------------------------------------------------|-----------|--------------------------------------------------------------------------------------------------------------------------------------------------------------------------------------------------------|-------------------------------|
| GmaAffx.85713.1.S1_at   | 0.00740383  | 2.77904 | AW396379 | NA                                                                                                                                                                                                                                                              | 0         | 0                                                                                                                                                                                                      | No Homology to Known Proteins |
| GmaAffx.86032.1.S1_at   | 0.00704285  | 2.17216 | BF597286 | NA                                                                                                                                                                                                                                                              | 0         | 0                                                                                                                                                                                                      | No Homology to Known Proteins |
| GmaAffx.86352.1.S1_at   | 0.0057152   | 2.19792 | BG238111 | NA                                                                                                                                                                                                                                                              | 0         | 0                                                                                                                                                                                                      | No Homology to Known Proteins |
| GmaAffx.87005.1.A1_at   | 0.014086    | 2.2356  | BI971502 | NA                                                                                                                                                                                                                                                              | 0         | 0                                                                                                                                                                                                      | No Homology to Known Proteins |
| GmaAffx.87886.1.S1_at   | 0.0128853   | 2.04975 | BU082696 | NA                                                                                                                                                                                                                                                              | 0         | 0                                                                                                                                                                                                      | No Homology to Known Proteins |
| GmaAffx.88555.1.A1_at   | 0.00705419  | 2.05705 | CD390916 | NA                                                                                                                                                                                                                                                              | 0         | 0                                                                                                                                                                                                      | No Homology to Known Proteins |
| GmaAffx.90548.1.S1_s_at | 2.40638E-06 | 10.2272 | CF806273 | NA                                                                                                                                                                                                                                                              | 0         | 0                                                                                                                                                                                                      | No Homology to Known Proteins |
| GmaAffx.90548.1.S1_x_at | 0.000473379 | 2.35554 | CF806273 | NA                                                                                                                                                                                                                                                              | 0         | 0                                                                                                                                                                                                      | No Homology to Known Proteins |
| GmaAffx.9778.1.S1_at    | 0.000678389 | 2.20488 | BM308105 | NA                                                                                                                                                                                                                                                              | 0         | 0                                                                                                                                                                                                      | No Homology to Known Proteins |
| Gma.5236.1.S1_at        | 0.000398881 | 2.42359 | BI969602 | RNA binding protein-like [Arabidopsis thaliana (Mouse-ear cress)]                                                                                                                                                                                               | AT3G54770 | RNA recognition motif (RRM)-containing protein                                                                                                                                                         | Post-Transcription            |
| GmaAffx.79131.1.A1_at   | 0.0138604   | 4.27703 | BE660395 | NA                                                                                                                                                                                                                                                              | AT3G23900 | RNA recognition motif (RRM)-containing protein                                                                                                                                                         | Post-Transcription            |
| GmaAffx.9348.1.S1_at    | 0.000333914 | 2.19983 | AW350108 | NA                                                                                                                                                                                                                                                              | AT1G78260 | RNA recognition motif (RRM)-containing protein                                                                                                                                                         | Post-Transcription            |
| Gma.16526.1.S1_at       | 0.000131887 | 2.6704  | CD407998 | Bifunctional nuclease [Zinnia elegans (Zinnia)]                                                                                                                                                                                                                 | AT3G12203 | SCPL17 (serine carboxypeptidase-like 17); serine carboxypeptidase                                                                                                                                      | Protein Destination & Storage |
| Gma.16870.1.A1_at       | 0.00458966  | 4.12079 | CD404774 | Peptidase M14, carboxypeptidase A [Medicago truncatula (Barrel medic)]                                                                                                                                                                                          | AT1G12330 | similar to unknown protein [Arabidopsis thaliana] (TAIR:AT5G12900.1); similar to Peptidase M14, carboxypeptidase A [Medicago truncatula] (GB:ABE94280.1); contains domain TNF receptor-like (SSF57586) | Protein Destination & Storage |
| Gma.2488.1.S1_at        | 9.50855E-05 | 2.50106 | CD406079 | Serine carboxypeptidase 2 precursor (EC 3.4.16.6) (Serine carboxypeptidase II) (Carboxypeptidase D) (Bri1 suppressor 1) [Contains: Serine carboxypeptidase 2 chain A (Serine carboxypeptidase II chain A); Serine carboxypeptidase 2 chain B (Serine carboxypep | AT4G30610 | BRS1 (BRI1 SUPPRESSOR 1)                                                                                                                                                                               | Protein Destination & Storage |
| Gma.3460.1.S1_at        | 0.0161624   | 6.63307 | BQ629044 | Subtilisin-like protease C1 [Glycine max (Soybean)]                                                                                                                                                                                                             | AT5G59190 | subtilase family protein                                                                                                                                                                               | Protein Destination & Storage |
| Gma.4914.2.S1_at        | 0.00355553  | 2.40298 | BI973233 | Root cap protein 2-like protein [Arabidopsis thaliana (Mouse-ear cress)]                                                                                                                                                                                        | AT5G54370 | late embryogenesis abundant protein-related / LEA protein-related                                                                                                                                      | Protein Destination & Storage |
| Gma.5139.1.S1_at        | 0.000783436 | 2.08465 | AF243376 | Glutathione S-transferase GST 21 [Glycine max (Soybean)]                                                                                                                                                                                                        | AT3G62760 | ATGSTF13 (Arabidopsis thaliana Glutathione S-transferase (class phi) 13); glutathione transferase                                                                                                      | Protein Destination & Storage |
| Gma.5994.1.S1_at        | 1.03325E-05 | 2.11194 | CD408043 | Proteinase inhibitor I25, cystatin [Medicago truncatula (Barrel medic)]                                                                                                                                                                                         | AT5G47550 | cysteine protease inhibitor, putative / cystatin, putative                                                                                                                                             | Protein Destination & Storage |
| Gma.6374.2.S1_at        | 0.00292293  | 2.28711 | CA799123 | Peptidase A1, pepsin [Medicago truncatula (Barrel medic)]                                                                                                                                                                                                       | AT5G07030 | pepsin A                                                                                                                                                                                               | Protein Destination & Storage |
| Gma.6633.2.S1_at        | 6.96022E-05 | 2.00504 | BE020127 | Ubiquitin conjugating protein-like [Arabidopsis thaliana (Mouse-ear cress)]                                                                                                                                                                                     | AT1G50490 | UBC20 (ubiquitin-conjugating enzyme 20); ubiquitin-protein ligase                                                                                                                                      | Protein Destination & Storage |

|                         |             |         |          |                                                                                                                                          |                         |                                                                                                                                                                                                                                                            |                               |
|-------------------------|-------------|---------|----------|------------------------------------------------------------------------------------------------------------------------------------------|-------------------------|------------------------------------------------------------------------------------------------------------------------------------------------------------------------------------------------------------------------------------------------------------|-------------------------------|
| GmaAffx.179.1.S1_at     | 0.000699045 | 2.06946 | AW164770 | Hypothetical protein F5A18.27 [Arabidopsis thaliana (Mouse-ear cress)]                                                                   | 0                       | 0                                                                                                                                                                                                                                                          | Protein Destination & Storage |
| GmaAffx.17961.2.S1_at   | 0.000653676 | 2.13985 | BG511562 | Heat shock protein Hsp70; Actin/actin-like [Medicago truncatula (Barrel medic)]                                                          | AT1G16030               | HSP70B (heat shock protein 70B); ATP binding                                                                                                                                                                                                               | Protein Destination & Storage |
| GmaAffx.21968.1.A1_at   | 1.92955E-05 | 5.91406 | BE660774 | Orn/DAP/Arg decarboxylase 2; Protease-associated PA; Proteinase inhibitor I9, subtilisin propeptide [Medicago truncatula (Barrel medic)] | AT5G67360               | ARA12; subtilase                                                                                                                                                                                                                                           | Protein Destination & Storage |
| GmaAffx.28861.1.S1_at   | 0.000118839 | 2.21926 | BU080561 | Orn/DAP/Arg decarboxylase 2; Protease-associated PA; Proteinase inhibitor I9, subtilisin propeptide [Medicago truncatula (Barrel medic)] | AT5G51750               | subtilase family protein                                                                                                                                                                                                                                   | Protein Destination & Storage |
| GmaAffx.31196.1.S1_s_at | 0.00420302  | 2.3675  | BE821537 | Subtilisin-like protease C1 [Glycine max (Soybean)]                                                                                      | AT4G15040               | subtilase family protein                                                                                                                                                                                                                                   | Protein Destination & Storage |
| GmaAffx.35346.1.S1_at   | 0.0011887   | 2.47671 | AW432825 | NA                                                                                                                                       | AT5G59190               | subtilase family protein                                                                                                                                                                                                                                   | Protein Destination & Storage |
| GmaAffx.39703.1.S1_at   | 0.000694126 | 2.52857 | BE023656 | Hypothetical protein [Arabidopsis thaliana (Mouse-ear cress)]                                                                            | AT2G23000;<br>AT2G23010 | [AT2G23000, SCPL10 (serine carboxypeptidase-like 10); serine carboxypeptidase];[AT2G23010, SCPL9; serine carboxypeptidase]                                                                                                                                 | Protein Destination & Storage |
| GmaAffx.39703.2.S1_s_at | 9.58739E-06 | 2.47004 | AW307363 | Serine carboxypeptidase, putative; 88458-86107 [Arabidopsis thaliana (Mouse-ear cress)]                                                  | AT1G73300;<br>AT5G36180 | [AT1G73300, SCPL2 (serine carboxypeptidase-like 2); serine carboxypeptidase];[AT5G36180, SCPL1 (serine carboxypeptidase-like 1); serine carboxypeptidase]                                                                                                  | Protein Destination & Storage |
| GmaAffx.5537.1.S1_at    | 0.00230214  | 2.4529  | BQ081493 | H <sup>+</sup> -transporting two-sector ATPase, delta (OSCP) subunit; Peptidase, metallopeptidases [Medicago truncatula (Barrel medic)]  | AT1G59970               | matrixin family protein                                                                                                                                                                                                                                    | Protein Destination & Storage |
| GmaAffx.61125.1.S1_at   | 0.000741727 | 2.56712 | CA799403 | MtN5 protein precursor [Medicago truncatula (Barrel medic)]                                                                              | 0                       | protease inhibitor/seed storage/lipid transfer protein (LTP) family protein                                                                                                                                                                                | Protein Destination & Storage |
| GmaAffx.6733.1.S1_at    | 0.000181925 | 2.01779 | AI736161 | Peptidase M14, carboxypeptidase A [Medicago truncatula (Barrel medic)]                                                                   | AT1G70230               | similar to unknown protein [Arabidopsis thaliana] (TAIR:AT1G01430.1); similar to Protein of unknown function DUF231, plant [Medicago truncatula] (GB:ABE83215.1); contains InterPro domain Protein of unknown function DUF231, plant; (InterPro:IPR004253) | Protein Destination & Storage |
| GmaAffx.68175.1.S1_at   | 0.00251251  | 4.12142 | BG650945 | Subtilisin-like protease C1 [Glycine max (Soybean)]                                                                                      | AT5G59190               | subtilase family protein                                                                                                                                                                                                                                   | Protein Destination & Storage |
| GmaAffx.69661.1.S1_at   | 0.00581155  | 2.01876 | BQ741578 | F611.14 protein [Arabidopsis thaliana (Mouse-ear cress)]                                                                                 | AT1G16860               | merozoite surface protein-related                                                                                                                                                                                                                          | Protein Destination & Storage |
| GmaAffx.71056.1.S1_at   | 0.00170768  | 2.11577 | BE329937 | Signal recognition particle 9 kDa protein [Arabidopsis thaliana (Mouse-ear cress)]                                                       | AT3G49100               | signal recognition particle 9 kDa protein, putative / SRP9, putative                                                                                                                                                                                       | Protein Destination & Storage |
| GmaAffx.82151.1.S1_at   | 0.00125325  | 4.91236 | BI471566 | Sali3-2 [Glycine max (Soybean)]                                                                                                          | AT5G25610               | RD22 (RESPONSIVE TO DESSICATION 22)                                                                                                                                                                                                                        | Protein Destination & Storage |
| GmaAffx.85056.1.S1_at   | 0.000404087 | 2.69211 | AI900723 | Hypothetical protein F2J7.6 [Arabidopsis thaliana (Mouse-ear cress)]                                                                     | AT1G25510               | aspartyl protease family protein                                                                                                                                                                                                                           | Protein Destination & Storage |
| GmaAffx.85056.2.S1_at   | 0.000338398 | 2.89919 | BU964909 | Hypothetical protein F2J7.6 [Arabidopsis thaliana (Mouse-ear cress)]                                                                     | AT1G25510               | aspartyl protease family protein                                                                                                                                                                                                                           | Protein Destination & Storage |
| GmaAffx.88625.1.A1_at   | 0.00211561  | 2.87771 | CD405589 | NA                                                                                                                                       | 0                       | 0                                                                                                                                                                                                                                                          | Protein Destination & Storage |

|                       |             |         |          |                                                                                                                    |                                       |                                                                                                                                                 |                               |
|-----------------------|-------------|---------|----------|--------------------------------------------------------------------------------------------------------------------|---------------------------------------|-------------------------------------------------------------------------------------------------------------------------------------------------|-------------------------------|
| GmaAffx.91908.1.S1_at | 0.004226    | 2.1586  | CF807624 | Hypothetical protein [Trifolium pratense (Red clover)]                                                             | AT1G09750                             | chloroplast nucleoid DNA-binding protein-related                                                                                                | Protein Destination & Storage |
| Gma.17934.1.S1_at     | 0.000866582 | 2.69531 | BG237988 | Translation initiation factor-like protein [Arabidopsis thaliana (Mouse-ear cress)]                                | AT5G54940                             | eukaryotic translation initiation factor SU11, putative                                                                                         | Protein Synthesis             |
| Gma.8953.1.S1_at      | 0.000247208 | 2.47603 | BU764603 | NA                                                                                                                 | 0                                     | 0                                                                                                                                               | Protein Synthesis             |
| GmaAffx.16959.1.S1_at | 0.000921763 | 2.0857  | CD486940 | Ribosomal protein L6, signature 2 [Medicago truncatula (Barrel medic)]                                             | AT5G53880                             | unknown protein                                                                                                                                 | Protein Synthesis             |
| GmaAffx.28702.1.S1_at | 0.00520442  | 4.44574 | BQ611373 | RS17 NEUCR 40S ribosomal protein S17 [Emericella nidulans (Aspergillus nidulans)]                                  | AT2G04390;<br>AT5G04800;<br>AT2G05220 | [AT2G04390, 40S ribosomal protein S17 (RPS17A)];[AT5G04800, 40S ribosomal protein S17 (RPS17D)];[AT2G05220, 40S ribosomal protein S17 (RPS17B)] | Protein Synthesis             |
| Gma.10150.1.A1_at     | 0.000122734 | 2.04816 | AW277321 | Arabidopsis thaliana genomic DNA, chromosome 3, P1 clone:MHC9 [Arabidopsis thaliana (Mouse-ear cress)]             | AT3G21420                             | oxidoreductase, 2OG-Fe(II) oxygenase family protein                                                                                             | Secondary Metabolism          |
| Gma.11298.3.S1_a_at   | 3.01151E-06 | 2.5471  | BE059139 | Pectate lyase [Fragaria ananassa (Strawberry)]                                                                     | AT1G04680                             | pectate lyase family protein                                                                                                                    | Secondary Metabolism          |
| Gma.1326.3.S1_at      | 0.000244884 | 2.49259 | AI442263 | Pectate lyase [Gossypium hirsutum (Upland cotton)]                                                                 | AT4G24780                             | pectate lyase family protein                                                                                                                    | Secondary Metabolism          |
| Gma.14846.1.A1_at     | 0.0121714   | 6.73894 | AW310268 | Gibberellin 20-oxidase [Phaseolus vulgaris (Kidney bean) (French bean)]                                            | 0                                     | 0                                                                                                                                               | Secondary Metabolism          |
| Gma.2826.1.S1_at      | 3.49057E-05 | 2.30248 | CD397710 | Chalcone isomerase 1B1 [Glycine max (Soybean)]                                                                     | AT3G55120                             | TT5 (TRANSPARENT TESTA 5); chalcone isomerase                                                                                                   | Secondary Metabolism          |
| Gma.2826.1.S1_s_at    | 0.000118766 | 2.1247  | CD397710 | Chalcone isomerase 1B1 [Glycine max (Soybean)]                                                                     | AT3G55120                             | TT5 (TRANSPARENT TESTA 5); chalcone isomerase                                                                                                   | Secondary Metabolism          |
| Gma.2826.1.S1_x_at    | 4.91566E-05 | 2.07693 | CD397710 | Chalcone isomerase 1B1 [Glycine max (Soybean)]                                                                     | AT3G55120                             | TT5 (TRANSPARENT TESTA 5); chalcone isomerase                                                                                                   | Secondary Metabolism          |
| Gma.3668.3.S1_a_at    | 8.46034E-05 | 2.42804 | AW704362 | 1-aminocyclopropane-1-carboxylic acid oxidase [Cicer arietinum (Chickpea) (Garbanzo)]                              | AT1G77330                             | 1-aminocyclopropane-1-carboxylate oxidase, putative / ACC oxidase, putative                                                                     | Secondary Metabolism          |
| Gma.3668.3.S1_at      | 0.000196378 | 2.4025  | AW704362 | 1-aminocyclopropane-1-carboxylic acid oxidase [Cicer arietinum (Chickpea) (Garbanzo)]                              | AT1G77330                             | 1-aminocyclopropane-1-carboxylate oxidase, putative / ACC oxidase, putative                                                                     | Secondary Metabolism          |
| Gma.4438.2.S1_at      | 0.00518023  | 2.05404 | BQ630502 | 2OG-Fe(II) oxygenase [Medicago truncatula (Barrel medic)]                                                          | AT5G24530                             | oxidoreductase, 2OG-Fe(II) oxygenase family protein                                                                                             | Secondary Metabolism          |
| Gma.5026.1.A1_at      | 0.000909206 | 2.05195 | BI970500 | Chlorophyllase 1 [Brassica oleracea (Wild cabbage)]                                                                | AT1G19670                             | ATCLH1 (CORONATINE-INDUCED PROTEIN 1)                                                                                                           | Secondary Metabolism          |
| GmaAffx.13717.1.S1_at | 0.00083662  | 2.59805 | BI316021 | Pectate lyase [Prunus mume (Japanese flowering apricot)]                                                           | AT4G24780                             | pectate lyase family protein                                                                                                                    | Secondary Metabolism          |
| GmaAffx.24016.1.S1_at | 0.0118319   | 2.66799 | BQ253682 | 2OG-Fe(II) oxygenase [Medicago truncatula (Barrel medic)]                                                          | AT4G21200                             | ATGA2OX8 (GIBBERELLIN 2-OXIDASE 8); gibberellin 2-beta-dioxygenase                                                                              | Secondary Metabolism          |
| GmaAffx.2941.2.S1_at  | 0.00545684  | 2.81791 | BM885445 | Putative chalcone isomerase 3 [Glycine max (Soybean)]                                                              | AT1G53520                             | chalcone-flavanone isomerase-related                                                                                                            | Secondary Metabolism          |
| GmaAffx.6567.1.S1_at  | 0.00895537  | 2.17877 | CD403256 | UDP rhamnose--anthocyanidin-3-glucoside rhamnosyltransferase-like protein [Arabidopsis thaliana (Mouse-ear cress)] | AT4G27560;<br>AT4G27570               | [AT4G27560, glycosyltransferase family protein];[AT4G27570, glycosyltransferase family protein]                                                 | Secondary Metabolism          |
| GmaAffx.77765.1.S1_at | 4.97307E-05 | 2.91973 | BI945137 | NA                                                                                                                 | AT3G27400                             | pectate lyase family protein                                                                                                                    | Secondary Metabolism          |
| GmaAffx.79052.1.S1_at | 0.000804657 | 2.17064 | BG726168 | Brassinosteroid biosynthetic protein LKB [Pisum sativum (Garden pea)]                                              | AT3G19820                             | DWF1 (DIMINUTO 1); catalytic                                                                                                                    | Secondary Metabolism          |
| GmaAffx.86023.1.S1_at | 0.000592774 | 2.23219 | BU761776 | Cytochrome P450 monooxygenase CYP701A16 [Glycine max (Soybean)]                                                    | AT5G25900                             | GA3 (GA REQUIRING 3); oxygen binding                                                                                                            | Secondary Metabolism          |

|                         |             |         |          |                                                                                                     |                         |                                                                                                                  |                      |
|-------------------------|-------------|---------|----------|-----------------------------------------------------------------------------------------------------|-------------------------|------------------------------------------------------------------------------------------------------------------|----------------------|
| GmaAffx.86830.1.S1_at   | 0.000735565 | 2.12983 | AW734373 | AT5g39050/MXF12 60 [Medicago truncatula (Barrel medic)]                                             | AT3G29590               | AT5MAT; O-malonyltransferase/transferase                                                                         | Secondary Metabolism |
| GmaAffx.92003.1.S1_at   | 0.000296649 | 2.15973 | CF807728 | Chalcone isomerase 1B1 [Glycine max (Soybean)]                                                      | AT3G55120               | TT5 (TRANSPARENT TESTA 5); chalcone isomerase                                                                    | Secondary Metabolism |
| GmaAffx.92003.1.S1_x_at | 0.000121417 | 2.31169 | CF807728 | Chalcone isomerase 1B1 [Glycine max (Soybean)]                                                      | AT3G55120               | TT5 (TRANSPARENT TESTA 5); chalcone isomerase                                                                    | Secondary Metabolism |
| GmaAffx.9455.1.S1_at    | 0.00232266  | 7.32026 | BI945275 | NA                                                                                                  | AT3G01270               | pectate lyase family protein                                                                                     | Secondary Metabolism |
| Gma.11076.1.S1_at       | 9.57253E-06 | 2.13766 | BE658385 | Rapid Alkalinization Factor [Medicago truncatula (Barrel medic)]                                    | AT4G14010               | RALFL32 (RALF-LIKE 32)                                                                                           | Signal Transduction  |
| Gma.11349.1.S1_at       | 3.72972E-05 | 3.14681 | AI442660 | Protein kinase [Medicago truncatula (Barrel medic)]                                                 | AT2G36570               | leucine-rich repeat transmembrane protein kinase, putative                                                       | Signal Transduction  |
| Gma.11810.1.S1_at       | 0.0119365   | 3.97345 | AW706115 | Serine/threonine-specific kinase like protein [Arabidopsis thaliana (Mouse-ear                      | AT5G55830               | lectin protein kinase, putative                                                                                  | Signal Transduction  |
| Gma.12435.1.S1_at       | 0.00538075  | 2.27114 | BE657686 | Calcium-binding EF-hand [Medicago truncatula (Barrel medic)]                                        | AT5G54490               | PBP1 (PINOID-BINDING PROTEIN 1); calcium ion binding                                                             | Signal Transduction  |
| Gma.12435.1.S1_x_at     | 0.0147231   | 2.06463 | BE657686 | Calcium-binding EF-hand [Medicago truncatula (Barrel medic)]                                        | AT5G54490               | PBP1 (PINOID-BINDING PROTEIN 1); calcium ion binding                                                             | Signal Transduction  |
| Gma.16705.1.S1_at       | 0.00548205  | 2.41237 | BM177533 | Receptor protein kinase-like protein [Arabidopsis thaliana (Mouse-ear cress)]                       | AT4G18250               | receptor serine/threonine kinase, putative                                                                       | Signal Transduction  |
| Gma.18035.1.S1_at       | 0.00291612  | 3.23714 | BQ452873 | Protein phosphatase 2C [Mesembryanthemum crystallinum (Common ice plant)]                           | AT4G31750               | protein phosphatase 2C, putative / PP2C, putative                                                                | Signal Transduction  |
| Gma.3986.1.S1_at        | 6.34712E-05 | 2.12148 | BQ453397 | F10O3.17 [Arabidopsis thaliana (Mouse-ear cress)]                                                   | AT1G03010               | phototropic-responsive NPH3 family protein                                                                       | Signal Transduction  |
| Gma.4832.1.A1_at        | 0.00404289  | 2.01709 | AW310458 | OSJNBb0015D13.18 protein [Oryza sativa (Rice)]                                                      | AT4G27290               | S-locus protein kinase, putative                                                                                 | Signal Transduction  |
| Gma.4868.1.A1_at        | 0.000912328 | 2.60305 | BI969469 | NA                                                                                                  | AT4G00970               | protein kinase family protein                                                                                    | Signal Transduction  |
| Gma.5627.1.S1_at        | 0.00414238  | 2.15976 | BE917603 | Receptor-like protein kinase homolog RK20-1 [Phaseolus vulgaris (Kidney bean) (French bean)]        | AT4G00970               | protein kinase family protein                                                                                    | Signal Transduction  |
| Gma.7726.1.A1_at        | 0.000800957 | 2.71447 | BM886413 | Calcium-binding EF-hand [Medicago truncatula (Barrel medic)]                                        | AT4G27280               | calcium-binding EF hand family protein                                                                           | Signal Transduction  |
| Gma.9436.1.S1_at        | 0.00251902  | 2.07435 | CA802734 | NA                                                                                                  | AT2G45890               | ATROPGEF4/ROPGEF4 (KINASE PARTNER PROTEIN-LIKE); Rho guanyl-nucleotide exchange factor                           | Signal Transduction  |
| GmaAffx.10790.1.S1_at   | 0.000146021 | 2.00587 | BU965333 | Protein kinase [Medicago truncatula (Barrel medic)]                                                 | AT2G36570               | leucine-rich repeat transmembrane protein kinase, putative                                                       | Signal Transduction  |
| GmaAffx.11598.1.S1_at   | 1.04285E-05 | 2.06658 | BE659531 | 40S ribosomal protein S5 [Cicer arietinum (Chickpea) (Garbanzo)]                                    | AT3G26700               | protein kinase family protein                                                                                    | Signal Transduction  |
| GmaAffx.15140.1.A1_at   | 0.0026194   | 2.02072 | BU545778 | Protein kinase; Heat shock protein Hsp20; Concanavalin A-like lectin/glucanase [Medicago truncatula | AT5G10530               | lectin protein kinase, putative                                                                                  | Signal Transduction  |
| GmaAffx.17677.1.S1_at   | 0.00391296  | 2.0242  | BF425713 | Putative calmodulin-like protein [Arabidopsis thaliana (Mouse-ear cress)]                           | AT2G15680;<br>AT2G15690 | [AT2G15680, calmodulin-related protein, putative];[AT2G15690, pentatricopeptide (PPR) repeat-containing protein] | Signal Transduction  |
| GmaAffx.19467.1.S1_at   | 0.000470887 | 3.02634 | BQ453237 | Hypothetical protein At5g18910/F17K4 160 [Arabidopsis thaliana (Mouse-ear                           | AT5G18910               | protein kinase family protein                                                                                    | Signal Transduction  |
| GmaAffx.21782.1.S1_at   | 0.0146575   | 4.5773  | BE555420 | Putative kinase interacting protein [Solanum demissum (Wild potato)]                                | 0                       | 0                                                                                                                | Signal Transduction  |

|                      |             |         |          |                                                                                                |           |                                                                                 |                     |
|----------------------|-------------|---------|----------|------------------------------------------------------------------------------------------------|-----------|---------------------------------------------------------------------------------|---------------------|
| GmaAfx.25687.1.S1_at | 0.00253343  | 2.4365  | BU551389 | Integrase, catalytic region [Medicago truncatula (Barrel medic)]                               | 0         | protein kinase family protein                                                   | Signal Transduction |
| GmaAfx.257.1.S1_at   | 0.00217338  | 2.25463 | AW348658 | Lectin-like protein kinase [Populus nigra (Lombardy poplar)]                                   | AT5G06740 | lectin protein kinase family protein                                            | Signal Transduction |
| GmaAfx.26457.1.S1_at | 0.00393179  | 2.14181 | BE608818 | Putative leucine-rich repeat/receptor protein kinase [Oryza sativa (japonica cultivar-group)]  | AT3G57830 | leucine-rich repeat transmembrane protein kinase, putative                      | Signal Transduction |
| GmaAfx.27056.1.S1_at | 0.000023216 | 2.08363 | BG154596 | NA                                                                                             | AT5G66330 | leucine-rich repeat family protein                                              | Signal Transduction |
| GmaAfx.30164.1.A1_at | 0.000294623 | 2.9449  | AW348715 | Putative receptor kinase [Malus domestica (Apple) (Malus sylvestris)]                          | AT2G36570 | leucine-rich repeat transmembrane protein kinase, putative                      | Signal Transduction |
| GmaAfx.32123.1.S1_at | 0.0142908   | 2.95041 | BI497881 | Lectin-like protein [Medicago truncatula (Barrel medic)]                                       | AT5G10530 | lectin protein kinase, putative                                                 | Signal Transduction |
| GmaAfx.38701.1.S1_at | 0.000492158 | 2.05128 | AW706276 | C2 [Medicago truncatula (Barrel medic)]                                                        | 0         | 0                                                                               | Signal Transduction |
| GmaAfx.41382.1.S1_at | 0.00170274  | 2.02093 | BI892866 | Hypothetical protein OJ1607A12.17 [Oryza sativa (japonica cultivar-group)]                     | AT4G14750 | IQD19 (IQ-DOMAIN 19); calmodulin binding                                        | Signal Transduction |
| GmaAfx.45212.1.S1_at | 0.00867029  | 2.47789 | BG154732 | Protein kinase [Medicago truncatula (Barrel medic)]                                            | AT4G23300 | protein kinase family protein                                                   | Signal Transduction |
| GmaAfx.46684.1.S1_at | 0.00256092  | 2.03272 | BQ081034 | Hypothetical protein [Arabidopsis thaliana (Mouse-ear cress)]                                  | AT3G03770 | leucine-rich repeat transmembrane protein kinase, putative                      | Signal Transduction |
| GmaAfx.47851.1.S1_at | 0.0149042   | 2.10042 | AI437780 | Receptor protein kinase-like protein [Arabidopsis thaliana (Mouse-ear cress)]                  | AT5G61480 | leucine-rich repeat transmembrane protein kinase, putative                      | Signal Transduction |
| GmaAfx.51790.1.S1_at | 0.0114946   | 4.00891 | BU761362 | Receptor protein kinase-like protein [Arabidopsis thaliana (Mouse-ear cress)]                  | AT5G67200 | leucine-rich repeat transmembrane protein kinase, putative                      | Signal Transduction |
| GmaAfx.52613.2.S1_at | 0.00772588  | 2.1045  | BU765614 | Putative serine/threonine protein kinase [Oryza sativa (japonica cultivar-group)]              | AT4G38470 | protein kinase family protein                                                   | Signal Transduction |
| GmaAfx.55178.1.S1_at | 0.00873587  | 2.01325 | BI974216 | WD40-like [Medicago truncatula (Barrel medic)]                                                 | AT5G15550 | transducin family protein / WD-40 repeat family protein                         | Signal Transduction |
| GmaAfx.62304.1.S1_at | 4.63039E-05 | 2.40488 | BM178289 | NA                                                                                             | AT4G38830 | protein kinase family protein                                                   | Signal Transduction |
| GmaAfx.66617.1.S1_at | 0.00259996  | 2.24681 | BU760718 | Leucine-rich receptor-like protein kinase [Malus domestica (Apple) (Malus sylvestris)]         | AT1G28440 | HSL1 (HAESA-LIKE 1); ATP binding / kinase/ protein serine/threonine kinase      | Signal Transduction |
| GmaAfx.68209.1.A1_at | 0.0015247   | 2.16913 | BE660689 | Hypothetical protein [Arabidopsis thaliana (Mouse-ear cress)]                                  | AT5G37660 | receptor-like protein kinase-related                                            | Signal Transduction |
| GmaAfx.70542.1.A1_at | 0.000166298 | 2.008   | CD409235 | 30S ribosomal protein S9, chloroplast precursor [Spinacia oleracea (Spinach)]                  | AT3G28040 | leucine-rich repeat transmembrane protein kinase, putative                      | Signal Transduction |
| GmaAfx.71066.1.S1_at | 0.0146505   | 4.45409 | AW307302 | Serine/threonine kinase [Persea americana (Avocado)]                                           | AT5G58380 | CIPK10 (CBL-INTERACTING PROTEIN KINASE 10); kinase                              | Signal Transduction |
| GmaAfx.78253.1.S1_at | 0.00046158  | 3.05465 | BM954563 | NA                                                                                             | AT4G38830 | protein kinase family protein                                                   | Signal Transduction |
| GmaAfx.82216.1.S1_at | 9.17258E-06 | 2.4785  | BI967512 | Rac small GTPase [Zinnia elegans (Zinnia)]                                                     | AT1G75840 | AT1G75840.1/ATGP3/ATROP4 (RHO-LIKE GTP BINDING PROTEIN 4); GTP binding / GTPase | Signal Transduction |
| GmaAfx.82254.1.S1_at | 0.00432817  | 2.25016 | BI786489 | Leucine rich repeat receptor kinase-like protein [Arabidopsis thaliana (Mouse-ear cress)]      | AT4G22730 | leucine-rich repeat transmembrane protein kinase, putative                      | Signal Transduction |
| GmaAfx.84209.1.S1_at | 0.000828725 | 2.04429 | BQ610588 | Probable histidine kinase [imported]-Arabidopsis thaliana [Medicago truncatula (Barrel medic)] | AT2G17820 | ATHK1 (HISTIDINE KINASE 1)                                                      | Signal Transduction |
| GmaAfx.87745.1.S1_at | 0.00523098  | 2.0096  | BQ627642 | NA                                                                                             | AT3G25905 | CLE27 (CLAVATA3/ESR-RELATED 27); receptor binding                               | Signal Transduction |

|                       |             |         |          |                                                                                         |                                       |                                                                                                                                                                                                    |                     |
|-----------------------|-------------|---------|----------|-----------------------------------------------------------------------------------------|---------------------------------------|----------------------------------------------------------------------------------------------------------------------------------------------------------------------------------------------------|---------------------|
| GmaAffx.88195.1.S1_at | 0.000509323 | 4.77881 | AI440894 | Protein kinase; EPSP synthase [Medicago truncatula (Barrel medic)]                      | AT4G21390                             | B120; protein kinase/ sugar binding                                                                                                                                                                | Signal Transduction |
| GmaAffx.88241.1.S1_at | 0.00419798  | 2.19113 | BU927089 | Putative kinase-like protein TMKL1 precursor [Arabidopsis thaliana (Mouse-ear cress)]   | AT3G24660                             | TMKL1 (TRANSMEMBRANE KINASE-LIKE 1); ATP binding / kinase/ protein serine/threonine kinase                                                                                                         | Signal Transduction |
| GmaAffx.8939.1.S1_at  | 0.00981589  | 2.11386 | BU549481 | Protein kinase; N-6 Adenine-specific DNA methylase [Medicago truncatula (Barrel medic)] | 0                                     | ARK2 (Arabidopsis Receptor Kinase 2); kinase                                                                                                                                                       | Signal Transduction |
| GmaAffx.93253.1.S1_at | 0.00103167  | 2.25597 | CF808047 | NA                                                                                      | AT2G44310                             | calcium-binding EF hand family protein                                                                                                                                                             | Signal Transduction |
| Gma.15943.1.S1_at     | 0.000217077 | 2.20589 | BM732034 | Putative ethylene response factor 5 [Vitis aestivalis (Grape)]                          | AT4G17490                             | ATERF6 (ETHYLENE RESPONSIVE ELEMENT BINDING FACTOR 6); DNA binding / transcription factor                                                                                                          | Transcription       |
| Gma.15943.2.S1_at     | 0.00263529  | 2.16151 | BE057404 | Putative ethylene response factor 5 [Vitis aestivalis (Grape)]                          | AT5G47230                             | ERF5 (ETHYLENE RESPONSIVE ELEMENT BINDING FACTOR 5); DNA binding / transcription factor/ transcriptional activator                                                                                 | Transcription       |
| Gma.163.1.A1_at       | 0.0120514   | 5.41469 | AB029269 | Homeodomain-related [Medicago truncatula (Barrel medic)]                                | AT3G06490                             | MYB108 (BOTRYTIS-SUSCEPTIBLE1, myb domain protein 108); DNA binding / transcription factor                                                                                                         | Transcription       |
| Gma.17944.1.S1_at     | 0.000806951 | 2.23502 | AW570024 | Auxin-induced protein 22C [Phaseolus aureus (Mung bean) (Vigna radiata)]                | AT3G15540                             | IAA19 (indoleacetic acid-induced protein 19); transcription factor                                                                                                                                 | Transcription       |
| Gma.18091.1.S1_at     | 0.00262449  | 2.1199  | BE347570 | NA                                                                                      | AT4G00950                             | MEE47 (maternal effect embryo arrest 47); transcription factor                                                                                                                                     | Transcription       |
| Gma.1920.1.A1_at      | 0.00337364  | 5.55743 | BE059071 | NA                                                                                      | AT2G45190                             | AFO (ABNORMAL FLORAL ORGANS); transcription factor                                                                                                                                                 | Transcription       |
| Gma.2115.1.S1_at      | 0.00130284  | 2.02411 | J03920   | Auxin-induced protein AUX22 [Glycine max (Soybean)]                                     | AT3G15540                             | IAA19 (indoleacetic acid-induced protein 19); transcription factor                                                                                                                                 | Transcription       |
| Gma.3975.1.S1_s_at    | 0.00140622  | 2.29833 | BQ453039 | Heat shock transcription factor 31 [Glycine max (Soybean)]                              | AT1G46264                             | AT-HSFB4 (Arabidopsis thaliana heat shock transcription factor B4); DNA binding / transcription factor                                                                                             | Transcription       |
| Gma.561.1.S1_at       | 8.23569E-05 | 2.34791 | BQ741052 | Helix-loop-helix DNA-binding [Medicago truncatula (Barrel medic)]                       | 0                                     | basic helix-loop-helix (bHLH) family protein (bHLH096)                                                                                                                                             | Transcription       |
| Gma.6324.1.S1_at      | 0.000220164 | 2.35678 | BQ612900 | NA                                                                                      | 0                                     | 0                                                                                                                                                                                                  | Transcription       |
| Gma.8067.1.A1_at      | 0.00001049  | 2.49583 | BU548251 | OSJNBb0096E05.11 protein [Oryza sativa (japonica cultivar-group)]                       | AT1G66040;<br>AT1G66050;<br>AT5G39550 | [AT1G66040, zinc finger (C3HC4-type RING finger) family protein];[AT1G66050, zinc finger (C3HC4-type RING finger) family protein];[AT5G39550, zinc finger (C3HC4-type RING finger) family protein] | Transcription       |
| Gma.8495.1.S1_at      | 0.0140158   | 2.96197 | AJ311808 | WIP1 protein [Glycine max (Soybean)]                                                    | 0                                     | TT1 (TRANSPARENT TESTA 1); transcription factor                                                                                                                                                    | Transcription       |
| Gma.9913.2.S1_a_at    | 0.00113162  | 2.28741 | CD390580 | NA                                                                                      | AT3G56400                             | WRKY70 (WRKY DNA-binding protein 70); transcription factor                                                                                                                                         | Transcription       |
| GmaAffx.10908.2.S1_at | 0.00691999  | 2.65354 | CA802289 | Gb AAF15936.1 [Arabidopsis thaliana (Mouse-ear cress)]                                  | 0                                     | MIF2 (MINI ZINC FINGER 2); DNA binding                                                                                                                                                             | Transcription       |
| GmaAffx.15955.1.S1_at | 0.00942921  | 2.24346 | AI495284 | Hypothetical protein At2g30420 [Arabidopsis thaliana (Mouse-ear cress)]                 | AT2G46410                             | CPC (CAPRICE); DNA binding / transcription factor                                                                                                                                                  | Transcription       |
| GmaAffx.18746.1.S1_at | 0.00326625  | 2.0254  | BU081844 | NA                                                                                      | AT3G44460                             | DPBF2 (BASIC LEUCINE ZIPPER TRANSCRIPTION FACTOR 67); DNA binding / transcription factor                                                                                                           | Transcription       |

|                         |             |         |          |                                                                                                             |           |                                                                                                   |               |
|-------------------------|-------------|---------|----------|-------------------------------------------------------------------------------------------------------------|-----------|---------------------------------------------------------------------------------------------------|---------------|
| GmaAffx.2553.1.S1_at    | 0.00507303  | 2.08688 | AW164352 | Putative PETHy;ZPT4-1 [ <i>Oryza sativa</i> (japonica cultivar-group)]                                      | 0         | zinc finger (C2H2 type) family protein                                                            | Transcription |
| GmaAffx.28599.1.S1_at   | 0.00330319  | 2.51814 | BE330504 | GRAS transcription factor [ <i>Medicago truncatula</i> (Barrel medic)]                                      | AT4G37650 | SHR (SHORT ROOT); transcription factor                                                            | Transcription |
| GmaAffx.32120.1.S1_at   | 3.07787E-05 | 3.5046  | BE059196 | MYB transcription factor MYB142 [ <i>Glycine max</i> (Soybean)]                                             | AT2G21650 | MEE3 (maternal effect embryo arrest 3); DNA binding / transcription factor                        | Transcription |
| GmaAffx.35033.1.S1_at   | 1.85912E-05 | 2.20155 | BI969048 | Response regulator receiver [ <i>Medicago truncatula</i> (Barrel medic)]                                    | AT3G57040 | ARR9 (RESPONSE REACTOR 4); transcription regulator                                                | Transcription |
| GmaAffx.38738.1.S1_at   | 0.00383102  | 2.26518 | BI967222 | KNOX1; KNOX2 [ <i>Medicago truncatula</i> (Barrel medic)]                                                   | AT4G08150 | KNAT1 (BREVIPEDICELLUS 1); transcription factor                                                   | Transcription |
| GmaAffx.40657.2.A1_at   | 0.000478035 | 2.13883 | CA937243 | Nuclear transcription factor Y subunit A-2 [ <i>Arabidopsis thaliana</i> (Mouse-ear cress)]                 | 0         | 0                                                                                                 | Transcription |
| GmaAffx.42856.1.S1_at   | 0.00489186  | 2.20421 | BM567981 | Hypothetical protein [ <i>Oryza sativa</i> (japonica cultivar-group)]                                       | AT1G51070 | basic helix-loop-helix (bHLH) family protein                                                      | Transcription |
| GmaAffx.43188.1.A1_at   | 0.00118769  | 2.50937 | CD408888 | NA                                                                                                          | 0         | 0                                                                                                 | Transcription |
| GmaAffx.47784.1.A1_at   | 0.00871219  | 3.44013 | CD408214 | Transcription factor E2F/dimerisation partner [ <i>Medicago truncatula</i> (Barrel medic)]                  | 0         | DEL1 (DP-E2F-like 1); transcription factor                                                        | Transcription |
| GmaAffx.50536.1.A1_x_at | 0.0122537   | 3.56831 | BI892928 | DNA-binding WRKY [ <i>Medicago truncatula</i> (Barrel medic)]                                               | 0         | 0                                                                                                 | Transcription |
| GmaAffx.50660.1.A1_at   | 5.74666E-05 | 2.09624 | BI971027 | NA                                                                                                          | AT5G19790 | RAP2.11 (related to AP2 11); DNA binding / transcription factor                                   | Transcription |
| GmaAffx.5069.1.S1_at    | 0.00347416  | 2.10346 | BM884991 | BZIP transcription factor BZI-2 [ <i>Nicotiana tabacum</i> (Common tobacco)]                                | AT4G34590 | GBF6 (G-box binding factor 6); DNA binding / transcription factor                                 | Transcription |
| GmaAffx.52983.1.A1_at   | 0.00198139  | 2.92284 | BE820933 | NA                                                                                                          | AT3G01140 | MYB106 (myb domain protein 106); DNA binding / transcription factor                               | Transcription |
| GmaAffx.53324.1.A1_at   | 0.00829058  | 2.26768 | AW309251 | Putative bHLH transcription factor [ <i>Arabidopsis thaliana</i> (Mouse-ear cress)]                         | AT2G22750 | basic helix-loop-helix (bHLH) family protein                                                      | Transcription |
| GmaAffx.5686.2.S1_at    | 0.00784549  | 3.52283 | BM526174 | NA                                                                                                          | AT1G63900 | zinc finger (C3HC4-type RING finger) family protein                                               | Transcription |
| GmaAffx.5879.1.S1_at    | 0.00512101  | 2.19835 | BI968201 | Transcription factor-like protein- <i>Arabidopsis thaliana</i> [ <i>Medicago truncatula</i> (Barrel medic)] | 0         | 0                                                                                                 | Transcription |
| GmaAffx.69720.1.S1_at   | 0.00180858  | 2.43284 | BU080896 | Putative pollen specific LIM domain-containing protein [ <i>Lycopersicon esculentum</i> (Tomato)]           | AT1G10200 | transcription factor LIM, putative                                                                | Transcription |
| GmaAffx.70292.1.S1_at   | 0.000416037 | 2.06816 | AW101778 | NA                                                                                                          | AT1G67030 | ZFP6 (ZINC FINGER PROTEIN 6); nucleic acid binding / transcription factor/ zinc ion binding       | Transcription |
| GmaAffx.72367.1.S1_at   | 0.00309959  | 2.27749 | BU082623 | AG-motif binding protein-1 [ <i>Nicotiana tabacum</i> (Common tobacco)]                                     | AT3G54810 | BME3/BME3-ZF (BLUE MICROPLYLAR END3); transcription factor                                        | Transcription |
| GmaAffx.73751.1.S1_at   | 6.71205E-05 | 3.82856 | BM522529 | NA                                                                                                          | AT1G22380 | transcription factor/ transferase, transferring glycosyl groups                                   | Transcription |
| GmaAffx.75209.1.S1_at   | 0.00130999  | 2.24963 | AI441434 | NA                                                                                                          | AT2G44840 | ATERF13/EREBP (ETHYLENE-RESPONSIVE ELEMENT BINDING FACTOR 13); DNA binding / transcription factor | Transcription |
| GmaAffx.77156.1.S1_at   | 0.000242476 | 8.59688 | BI425820 | Helix-loop-helix DNA-binding [ <i>Medicago truncatula</i> (Barrel medic)]                                   | AT2G40200 | basic helix-loop-helix (bHLH) family protein                                                      | Transcription |

|                         |             |         |          |                                                                                                        |                         |                                                                                                                                                       |               |
|-------------------------|-------------|---------|----------|--------------------------------------------------------------------------------------------------------|-------------------------|-------------------------------------------------------------------------------------------------------------------------------------------------------|---------------|
| GmaAffx.80889.1.S1_at   | 0.000329117 | 2.35784 | BU084219 | NAC domain protein NAC1 [Phaseolus vulgaris (Kidney bean) (French bean)]                               | AT1G56010               | NAC1 (Arabidopsis NAC domain containing protein 21, Arabidopsis NAC domain containing protein 22); transcription factor                               | Transcription |
| GmaAffx.84825.1.S1_at   | 0.00349108  | 2.06057 | BI968165 | TCP family transcription factor containing protein, expressed [Oryza sativa (japonica cultivar-group)] | 0                       | TCP family transcription factor, putative                                                                                                             | Transcription |
| GmaAffx.86848.1.S1_at   | 0.00538459  | 2.34548 | BE211253 | Leucine zipper, homeobox-associated; Homeodomain-related [Medicago truncatula (Barrel medic)]          | AT3G01220               | ATHB20 (ARABIDOPSIS THALIANA HOMEODOMAIN PROTEIN 20); DNA binding / transcription factor                                                              | Transcription |
| GmaAffx.8854.1.S1_at    | 0.00585296  | 2.45601 | AI496452 | Hypothetical protein F9D24.30 [Arabidopsis thaliana (Mouse-ear cress)]                                 | AT3G58120               | bZIP transcription factor family protein                                                                                                              | Transcription |
| GmaAffx.88598.1.S1_s_at | 0.0121767   | 3.39817 | CD400102 | NA                                                                                                     | 0                       | 0                                                                                                                                                     | Transcription |
| GmaAffx.91895.1.S1_at   | 0.00645243  | 4.31131 | CF807620 | DNA-binding WRKY [Medicago truncatula (Barrel medic)]                                                  | 0                       | 0                                                                                                                                                     | Transcription |
| GmaAffx.93343.1.S1_s_at | 0.00581041  | 2.30124 | CF809068 | DNA-binding WRKY [Medicago truncatula (Barrel medic)]                                                  | AT3G56400               | WRKY70 (WRKY DNA-binding protein 70); transcription factor                                                                                            | Transcription |
| GmaAffx.976.1.S1_at     | 0.00358191  | 2.38431 | BG238528 | BTB/POZ; NPH3 [Medicago truncatula (Barrel medic)]                                                     | AT5G64330               | NPH3 (NON-PHOTOTROPIC HYPOCOTYL 3); signal transducer                                                                                                 | Transcription |
| Gma.10253.1.S1_at       | 0.00259475  | 2.10408 | AW310916 | Amino acid transporter [Vicia faba (Broad bean)]                                                       | AT1G77380               | AAP3 (amino acid permease 3); amino acid permease                                                                                                     | Transporter   |
| Gma.11661.1.A1_at       | 7.35967E-05 | 2.3016  | CD416993 | Metal transport protein [Medicago truncatula (Barrel medic)]                                           | AT1G05300               | ZIP5 (ZINC TRANSPORTER 5 PRECURSOR); cation transporter                                                                                               | Transporter   |
| Gma.11661.1.A1_x_at     | 0.000217527 | 2.44822 | CD416993 | Metal transport protein [Medicago truncatula (Barrel medic)]                                           | AT1G05300               | ZIP5 (ZINC TRANSPORTER 5 PRECURSOR); cation transporter                                                                                               | Transporter   |
| Gma.12731.1.S1_at       | 0.000255434 | 2.13709 | BF009846 | NA                                                                                                     | AT5G18290               | SIP1;2 (SMALL AND BASIC INTRINSIC PROTEIN1B)                                                                                                          | Transporter   |
| Gma.13252.1.S1_at       | 0.00306351  | 2.82078 | AW423744 | Nod26-like major intrinsic protein [Cicer arietinum (Chickpea) (Garbanzo)]                             | AT5G37810;<br>AT5G37820 | [AT5G37810, NIP4;1/NLM4 (NOD26-LIKE INTRINSIC PROTEIN 4;1); water channel];[AT5G37820, NIP4;2/NLM5 (NOD26-LIKE INTRINSIC PROTEIN 4;2); water channel] | Transporter   |
| Gma.2972.2.S1_at        | 0.000952537 | 2.52383 | BM522991 | NA                                                                                                     | AT1G72150               | PATL1 (PATELLIN 1); transporter                                                                                                                       | Transporter   |
| Gma.4779.1.A1_at        | 0.000207846 | 2.04623 | AW396769 | Nodulin-like protein [Arabidopsis thaliana (Mouse-ear cress)]                                          | AT3G25190               | nodulin, putative                                                                                                                                     | Transporter   |
| Gma.5330.2.S1_at        | 0.0123377   | 2.0435  | BM092298 | F19K23.20 protein [Arabidopsis thaliana (Mouse-ear cress)]                                             | AT1G62280               | C4-dicarboxylate transporter/malic acid transport family protein                                                                                      | Transporter   |
| Gma.5998.1.A1_at        | 0.000930332 | 2.36272 | BI968591 | Plasma membrane intrinsic protein 2;5 [Mimosa pudica (Sensitive plant)]                                | 0                       | PIP3 (PLASMA MEMBRANE INTRINSIC PROTEIN 3); water channel                                                                                             | Transporter   |
| Gma.6352.1.S1_at        | 0.00631524  | 2.02664 | BQ613046 | Nitrate transporter [Populus tremula x Populus tremuloides]                                            | AT1G12940               | ATNRT2.5 (NITRATE TRANSPORTER2.5); nitrate transporter                                                                                                | Transporter   |
| GmaAffx.1203.1.A1_at    | 0.00361197  | 2.12261 | BU548965 | NA                                                                                                     | AT3G02850               | SKOR (stelar K+ outward rectifier); cyclic nucleotide binding / outward rectifier potassium channel                                                   | Transporter   |
| GmaAffx.20414.1.S1_at   | 0.00344558  | 2.85149 | CD410957 | Major intrinsic protein [Medicago truncatula (Barrel medic)]                                           | 0                       | 0                                                                                                                                                     | Transporter   |
| GmaAffx.26311.1.S1_at   | 0.000707262 | 2.1497  | BE348003 | Nodulin-like protein [Arabidopsis thaliana (Mouse-ear cress)]                                          | AT2G39210               | nodulin family protein                                                                                                                                | Transporter   |
| GmaAffx.31403.1.S1_at   | 0.00002635  | 2.98251 | BF424943 | Metal transport protein [Medicago truncatula (Barrel medic)]                                           | AT3G12750               | ZIP1 (ZINC TRANSPORTER 1 PRECURSOR); zinc ion transporter                                                                                             | Transporter   |

|                       |             |         |          |                                                                                                  |           |                                                                                                             |             |
|-----------------------|-------------|---------|----------|--------------------------------------------------------------------------------------------------|-----------|-------------------------------------------------------------------------------------------------------------|-------------|
| GmaAffx.35303.1.S1_at | 0.00392741  | 2.27541 | BE440840 | Hypothetical protein AT4g05130 [Arabidopsis thaliana (Mouse-ear cress)]                          | 0         | equilibrative nucleoside transporter, putative (ENT4)                                                       | Transporter |
| GmaAffx.35364.4.S1_at | 0.00290651  | 2.04824 | AW706990 | Importin alpha-1 subunit [Arabidopsis thaliana (Mouse-ear cress)]                                | AT3G06720 | AT-IMP (Arabidopsis thaliana importin alpha); protein transporter                                           | Transporter |
| GmaAffx.36156.1.S1_at | 0.000374386 | 2.06676 | BG405325 | Probable sulfate transporter 3.4 [Arabidopsis thaliana (Mouse-ear cress)]                        | AT3G15990 | SULTR3;4 (SULTR3;4); sulfate transporter                                                                    | Transporter |
| GmaAffx.38430.1.S1_at | 0.00716402  | 2.37859 | CA936241 | NA                                                                                               | AT4G30360 | ATCNGC17 (cyclic nucleotide gated channel 17); calmodulin binding / cyclic nucleotide binding / ion channel | Transporter |
| GmaAffx.39397.1.S1_at | 0.000412966 | 2.11995 | BE657958 | TGF-beta receptor, type I/II extracellular region [Medicago truncatula (Barrel                   | AT1G27040 | nitrate transporter, putative                                                                               | Transporter |
| GmaAffx.48172.1.S1_at | 0.000286434 | 2.47118 | BF009291 | Putative phosphate transporter 1 [Arabidopsis thaliana (Mouse-ear cress)]                        | AT3G23430 | PHO1 (PHOSPHATE 1)                                                                                          | Transporter |
| GmaAffx.51409.1.S1_at | 0.00133101  | 2.05632 | BM309035 | F3O9.19 protein [Arabidopsis thaliana (Mouse-ear cress)]                                         | AT1G16390 | organic cation transporter-related                                                                          | Transporter |
| GmaAffx.52051.1.S1_at | 0.000441912 | 2.69672 | CA802879 | Sugar transporter superfamily [Medicago truncatula (Barrel medic)]                               | 0         | 0                                                                                                           | Transporter |
| GmaAffx.5538.1.A1_at  | 5.07748E-05 | 2.85651 | BQ081719 | Amino acid transporter [Pisum sativum (Garden pea)]                                              | 0         | 0                                                                                                           | Transporter |
| GmaAffx.61311.1.S1_at | 0.00370223  | 2.23777 | CA936951 | OSJNBb0103I08.20 protein [Oryza sativa (japonica cultivar-group)]                                | AT3G10600 | CAT7 (CATIONIC AMINO ACID TRANSPORTER 7); cationic amino acid transporter                                   | Transporter |
| GmaAffx.65095.1.S1_at | 0.000744654 | 2.96438 | BM108105 | Putative organic cation transport protein [Phaseolus vulgaris (Kidney bean) (French bean)]       | AT1G73220 | sugar transporter family protein                                                                            | Transporter |
| GmaAffx.66101.2.S1_at | 0.00536583  | 2.25798 | AW620528 | Zinc/iron permease [Medicago truncatula (Barrel medic)]                                          | AT1G10970 | ZIP4 (ZINC TRANSPORTER 4 PRECURSOR); cation transporter                                                     | Transporter |
| GmaAffx.70959.1.S1_at | 0.000252745 | 2.18414 | BE611219 | Phosphate translocator-like [Oryza sativa (japonica cultivar-group)]                             | AT1G06890 | transporter-related                                                                                         | Transporter |
| GmaAffx.76516.1.S1_at | 0.00215799  | 3.25476 | BE661181 | Putative organic cation transport protein [Phaseolus vulgaris (Kidney bean) (French bean)]       | AT1G73220 | sugar transporter family protein                                                                            | Transporter |
| GmaAffx.80532.2.S1_at | 0.000702366 | 2.04573 | AW757083 | Transporter-related-like [Oryza sativa (japonica cultivar-group)]                                | AT5G42420 | transporter-related                                                                                         | Transporter |
| GmaAffx.81056.1.S1_at | 0.00307772  | 3.95321 | AW597777 | Putative organic cation transport protein [Phaseolus vulgaris (Kidney bean) (French bean)]       | AT1G73220 | sugar transporter family protein                                                                            | Transporter |
| GmaAffx.81873.1.S1_at | 1.64401E-05 | 2.17007 | BM522600 | TGF-beta receptor, type I/II extracellular region [Medicago truncatula (Barrel                   | AT3G53960 | proton-dependent oligopeptide transport (POT) family protein                                                | Transporter |
| GmaAffx.82105.1.S1_at | 0.0151501   | 2.09678 | AI938690 | Sucrose transporter [Glycine max (Soybean)]                                                      | AT5G06170 | ATSUC9 (SUCROSE-PROTON SYMPORTER 9); carbohydrate transporter/ sucrose:hydrogen symporter/ sugar porter     | Transporter |
| GmaAffx.82168.1.S1_at | 0.00680717  | 2.40647 | BI498123 | Ammonium transporter [Oryza sativa (japonica cultivar-group)]                                    | AT2G38290 | ATAMT2 (AMMONIUM TRANSPORTER 2); ammonium transporter                                                       | Transporter |
| GmaAffx.84719.1.S1_at | 0.00038243  | 2.12813 | BE058555 | Phosphate/phosphoenolpyruvate translocator-like protein [Arabidopsis thaliana (Mouse-ear cress)] | AT5G04160 | phosphate translocator-related                                                                              | Transporter |

|                         |             |         |          |                                                                                            |           |                                                                                                                                                                                                                                                                  |              |
|-------------------------|-------------|---------|----------|--------------------------------------------------------------------------------------------|-----------|------------------------------------------------------------------------------------------------------------------------------------------------------------------------------------------------------------------------------------------------------------------|--------------|
| GmaAffx.89363.1.S1_s_at | 0.00117405  | 2.03525 | CK606317 | Aquaglyceroporin (Tonoplast intrinsic protein (Tipa)) [Nicotiana tabacum (Common tobacco)] | AT2G25810 | TIP4;1 (tonoplast intrinsic protein 4;1); water channel                                                                                                                                                                                                          | Transporter  |
| GmaAffx.42439.1.S1_at   | 0.00282589  | 2.56682 | BU084039 | Transposon protein, putative, unclassified [Oryza sativa (japonica cultivar-group)]        | 0         | 0                                                                                                                                                                                                                                                                | Transposon   |
| Gma.12342.1.S1_s_at     | 0.0142664   | 3.49334 | CD405864 | Unidentified precursor [Medicago sativa (Alfalfa)]                                         | AT5G11420 | similar to unknown protein [Arabidopsis thaliana] (TAIR:AT5G25460.1); similar to unknown [Ricinus communis] (GB:CAB02653.1); contains InterPro domain Galactose-binding like; (InterPro:IPR008979); contains InterPro domain Protein of unknown function DUF642  | Unclassified |
| Gma.13034.1.S1_at       | 0.000499648 | 3.78521 | CD395146 | Putative auxin-regulated protein [Arabidopsis thaliana (Mouse-ear cress)]                  | AT1G75580 | auxin-responsive protein, putative                                                                                                                                                                                                                               | Unclassified |
| Gma.13042.1.S1_at       | 8.50055E-05 | 2.1986  | CD390874 | NA                                                                                         | AT5G03210 | unknown protein                                                                                                                                                                                                                                                  | Unclassified |
| Gma.13240.1.A1_at       | 0.000268384 | 2.00101 | CD407026 | Hypothetical protein T5J8.12 [Arabidopsis thaliana (Mouse-ear cress)]                      | AT4G02800 | similar to unknown protein [Arabidopsis thaliana] (TAIR:AT5G01970.1); similar to Os04g0228100 [Oryza sativa (japonica cultivar-group)] (GB:NP001052288.1); similar to H0209A05.2 [Oryza sativa (indica cultivar-group)] (GB:CAH66085.1)                          | Unclassified |
| Gma.13501.1.A1_at       | 1.61015E-06 | 2.13499 | CD399296 | Hypothetical protein [Arabidopsis thaliana (Mouse-ear cress)]                              | 0         | 0                                                                                                                                                                                                                                                                | Unclassified |
| Gma.1402.1.S1_at        | 0.00287231  | 3.0679  | BU548218 | Hypothetical protein [Arabidopsis thaliana (Mouse-ear cress)]                              | AT2G23690 | similar to unknown protein [Arabidopsis thaliana] (TAIR:AT4G37240.1); similar to TMV response-related gene product [Nicotiana tabacum] (GB:BAB41200.1); similar to hypothetical protein [Oryza sativa (japonica cultivar-group)] (GB:BAC83793.1)                 | Unclassified |
| Gma.14054.1.S1_at       | 0.00301276  | 2.53162 | CD414577 | Hypothetical protein [Arabidopsis thaliana (Mouse-ear cress)]                              | AT2G30900 | similar to unknown protein [Arabidopsis thaliana] (TAIR:AT1G78710.1); similar to unknown protein [Arabidopsis thaliana] (TAIR:AT2G42570.1); similar to unknown [Pisum sativum] (GB:ABA29158.1); similar to Os01g0652100 [Oryza sativa (japonica cultivar-group)] | Unclassified |
| Gma.14176.1.A1_at       | 8.43034E-05 | 2.22962 | CD417226 | Hypothetical protein T5J8.12 [Arabidopsis thaliana (Mouse-ear cress)]                      | 0         | 0                                                                                                                                                                                                                                                                | Unclassified |
| Gma.144.1.S1_at         | 0.00365002  | 2.57218 | AF065435 | Nodulin [Glycine max (Soybean)]                                                            | 0         | 0                                                                                                                                                                                                                                                                | Unclassified |
| Gma.15511.1.S1_s_at     | 0.00133563  | 2.9795  | CD415063 | NA                                                                                         | 0         | 0                                                                                                                                                                                                                                                                | Unclassified |
| Gma.15577.1.S1_at       | 8.48008E-05 | 2.39855 | CD399075 | NA                                                                                         | AT1G31335 | similar to Os03g0780200 [Oryza sativa (japonica cultivar-group)] (GB:NP001051448.1)                                                                                                                                                                              | Unclassified |

|                    |             |         |          |                                                                         |           |                                                                                                                                                                                                                                                            |              |
|--------------------|-------------|---------|----------|-------------------------------------------------------------------------|-----------|------------------------------------------------------------------------------------------------------------------------------------------------------------------------------------------------------------------------------------------------------------|--------------|
| Gma.17329.1.S1_at  | 0.00612722  | 2.21098 | AW568528 | NA                                                                      | AT1G11915 | similar to unknown protein [Arabidopsis thaliana] (TAIR:AT3G17350.1); similar to Os05g0409100 [Oryza sativa (japonica cultivar-group)] (GB:NP001055526.1); similar to Os06g0364500 [Oryza sativa (japonica cultivar-group)] (GB:NP001057608.1)             | Unclassified |
| Gma.1735.1.A1_at   | 0.00230676  | 2.4092  | BE658596 | Hypothetical protein [Medicago truncatula (Barrel medic)]               | 0         | 0                                                                                                                                                                                                                                                          | Unclassified |
| Gma.17490.1.S1_at  | 0.00104572  | 3.6105  | BG047161 | Expressed protein, putative [Medicago truncatula (Barrel medic)]        | 0         | 0                                                                                                                                                                                                                                                          | Unclassified |
| Gma.17587.1.S1_at  | 2.04707E-05 | 3.06039 | BG791179 | Hypothetical protein F24B22.22 [Arabidopsis thaliana (Mouse-ear cress)] | AT3G54260 | similar to unknown protein [Arabidopsis thaliana] (TAIR:AT2G42570.1); similar to unknown [Pisum sativum] (GB:ABA29157.1); contains InterPro domain Protein of unknown function DUF231, plant; (InterPro:IPR004253)                                         | Unclassified |
| Gma.17587.2.S1_at  | 0.000352681 | 3.80892 | BI316791 | Hypothetical protein F24B22.22 [Arabidopsis thaliana (Mouse-ear cress)] | AT3G54260 | similar to unknown protein [Arabidopsis thaliana] (TAIR:AT2G42570.1); similar to unknown [Pisum sativum] (GB:ABA29157.1); contains InterPro domain Protein of unknown function DUF231, plant; (InterPro:IPR004253)                                         | Unclassified |
| Gma.17784.1.S1_at  | 0.00332216  | 2.69541 | BE822305 | Hypothetical protein [Medicago truncatula (Barrel medic)]               | AT5G01360 | similar to unknown protein [Arabidopsis thaliana] (TAIR:AT3G55990.1); similar to Protein of unknown function DUF231, plant [Medicago truncatula] (GB:ABE79610.1); contains InterPro domain Protein of unknown function DUF231, plant; (InterPro:IPR004253) | Unclassified |
| Gma.17885.1.S1_at  | 0.00351918  | 4.5857  | CD410373 | NA                                                                      | 0         | 0                                                                                                                                                                                                                                                          | Unclassified |
| Gma.17917.1.S1_at  | 0.000136304 | 2.60265 | CF921609 | Suspensor-specific protein [Phaseolus coccineus (Scarlet runner bean)]  | AT1G49310 | unknown protein                                                                                                                                                                                                                                            | Unclassified |
| Gma.17951.1.S1_at  | 0.00218074  | 2.13294 | BE821378 | NA                                                                      | AT2G01870 | unknown protein                                                                                                                                                                                                                                            | Unclassified |
| Gma.17992.1.S1_at  | 0.0156238   | 2.07213 | BG157311 | Hypothetical protein [Medicago truncatula (Barrel medic)]               | 0         | 0                                                                                                                                                                                                                                                          | Unclassified |
| Gma.2062.2.S1_a_at | 0.000317438 | 3.16054 | BF424226 | Hypothetical protein [Medicago truncatula (Barrel medic)]               | 0         | 0                                                                                                                                                                                                                                                          | Unclassified |
| Gma.3175.1.S1_at   | 0.00363611  | 2.17824 | AI736154 | NA                                                                      | AT3G13950 | similar to unknown protein [Arabidopsis thaliana] (TAIR:AT4G13266.1); similar to conserved hypothetical protein [Medicago truncatula] (GB:ABE80572.1)                                                                                                      | Unclassified |
| Gma.3766.1.S1_at   | 0.00414787  | 3.13268 | BE023976 | NA                                                                      | 0         | 0                                                                                                                                                                                                                                                          | Unclassified |
| Gma.3806.1.S1_at   | 0.000534773 | 2.05565 | BQ452617 | At2g46890/F19D11.17 [Arabidopsis thaliana (Mouse-ear cress)]            | 0         | 0                                                                                                                                                                                                                                                          | Unclassified |
| Gma.4036.1.S1_at   | 0.000144259 | 2.23267 | BQ453552 | Hypothetical protein [Medicago truncatula (Barrel medic)]               | 0         | 0                                                                                                                                                                                                                                                          | Unclassified |

|                    |             |         |          |                                                                         |           |                                                                                                                                                                                                                                                                       |              |
|--------------------|-------------|---------|----------|-------------------------------------------------------------------------|-----------|-----------------------------------------------------------------------------------------------------------------------------------------------------------------------------------------------------------------------------------------------------------------------|--------------|
| Gma.407.1.A1_at    | 0.0010207   | 2.34128 | AW348889 | NA                                                                      | AT1G76240 | similar to unknown protein [Arabidopsis thaliana] (TAIR:AT2G17080.1); similar to Os06g0725700 [Oryza sativa (japonica cultivar-group)] (GB:NP001058624.1); similar to Os06g0725500 [Oryza sativa (japonica cultivar-group)] (GB:NP001058623.1)                        | Unclassified |
| Gma.4736.1.A1_at   | 0.00195824  | 2.40149 | BI968966 | NA                                                                      | AT2G28580 | similar to unknown protein [Arabidopsis thaliana] (TAIR:AT2G44930.1); similar to Plant protein of unknown function [Medicago truncatula] (GB:ABE78995.1); contains InterPro domain Protein of unknown function DUF247, plant; (InterPro:IPR004158)                    | Unclassified |
| Gma.5367.1.S1_at   | 0.0159509   | 4.72674 | BM092848 | Hypothetical protein At2g40435 [Arabidopsis thaliana (Mouse-ear cress)] | AT2G40435 | similar to unknown protein [Arabidopsis thaliana] (TAIR:AT3G56220.1); similar to Os03g0338400 [Oryza sativa (japonica cultivar-group)] (GB:NP001050055.1); similar to hypothetical protein [Oryza sativa (japonica cultivar-group)] (GB:BAC10078.1)                   | Unclassified |
| Gma.5812.1.S1_at   | 1.41837E-06 | 2.331   | AI855901 | Hypothetical protein [Medicago truncatula (Barrel medic)]               | 0         | 0                                                                                                                                                                                                                                                                     | Unclassified |
| Gma.6219.1.S1_at   | 0.000218772 | 2.58734 | BQ612268 | NA                                                                      | AT1G23840 | similar to unknown protein [Arabidopsis thaliana] (TAIR:AT1G23830.1)                                                                                                                                                                                                  | Unclassified |
| Gma.6529.2.S1_s_at | 0.000225389 | 2.15963 | BM309390 | Hypothetical protein [Medicago truncatula (Barrel medic)]               | AT1G55360 | similar to unknown protein [Arabidopsis thaliana] (TAIR:AT5G56530.1); similar to unknown protein [Arabidopsis thaliana] (TAIR:AT3G13510.1); similar to Os07g0205500 [Oryza sativa (japonica cultivar-group)] (GB:NP001059148.1); similar to Os07g0573400 Oryza sativa | Unclassified |
| Gma.7107.1.S1_at   | 0.00195472  | 2.05946 | AI855972 | NA                                                                      | AT5G40210 | nodulin MtN21 family protein                                                                                                                                                                                                                                          | Unclassified |
| Gma.7837.1.A1_at   | 0.00128937  | 2.19476 | BU550576 | Hypothetical protein At3g44150 [Arabidopsis thaliana (Mouse-ear cress)] | 0         | 0                                                                                                                                                                                                                                                                     | Unclassified |
| Gma.8021.2.S1_at   | 1.83839E-05 | 2.05243 | CA782136 | NA                                                                      | AT3G54500 | similar to dentin sialophosphoprotein-related [Arabidopsis thaliana] (TAIR:AT5G64170.2); similar to conserved hypothetical protein [Medicago truncatula] (GB:ABD28297.1)                                                                                              | Unclassified |
| Gma.817.1.A1_s_at  | 0.000162936 | 4.5241  | BQ741341 | Zinc finger, RanBP2-type [Medicago truncatula (Barrel medic)]           | 0         | binding                                                                                                                                                                                                                                                               | Unclassified |

|                       |             |         |          |                                                                         |                         |                                                                                                                                                                                                                                                                 |              |
|-----------------------|-------------|---------|----------|-------------------------------------------------------------------------|-------------------------|-----------------------------------------------------------------------------------------------------------------------------------------------------------------------------------------------------------------------------------------------------------------|--------------|
| Gma.9696.1.S1_at      | 0.00987717  | 2.29359 | AW317636 | Protein At5g22580 [Arabidopsis thaliana (Mouse-ear cress)]              | AT5G22580               | Identical to Protein At5g22580 [Arabidopsis Thaliana] (GB:Q9FK81); similar to stable protein 1-related [Arabidopsis thaliana] (TAIR:AT3G17210.1); similar to hypothetical protein [Cucumis melo] (GB:BAD93607.1); contains InterPro domain Stress responsive al | Unclassified |
| Gma.9852.1.S1_at      | 0.000702627 | 2.35723 | AW432620 | NA                                                                      | AT3G29370               | similar to unknown protein [Arabidopsis thaliana] (TAIR:AT5G39240.1); contains InterPro domain Helix-loop-helix DNA-binding; (InterPro:IPR011598)                                                                                                               | Unclassified |
| GmaAffx.10491.1.S1_at | 0.00220125  | 2.02497 | AW598141 | Similarity to unknown protein [Arabidopsis thaliana (Mouse-ear cress)]  | 0                       | 0                                                                                                                                                                                                                                                               | Unclassified |
| GmaAffx.11889.1.S1_at | 0.00213523  | 2.02973 | BE657528 | NA                                                                      | AT4G10920;<br>AT4G10910 | [AT4G10920, KELP];[AT4G10910, unknown protein]                                                                                                                                                                                                                  | Unclassified |
| GmaAffx.14034.1.S1_at | 0.00665715  | 4.83199 | BI944018 | Hypothetical protein At2g16050 [Arabidopsis thaliana (Mouse-ear cress)] | 0                       | DC1 domain-containing protein                                                                                                                                                                                                                                   | Unclassified |
| GmaAffx.15275.1.A1_at | 0.000802672 | 7.72897 | BU761115 | NA                                                                      | 0                       | 0                                                                                                                                                                                                                                                               | Unclassified |
| GmaAffx.1814.1.S1_at  | 1.92181E-05 | 2.40546 | BM271403 | Hypothetical protein [Medicago truncatula (Barrel medic)]               | AT5G03190               | similar to unknown protein [Arabidopsis thaliana] (TAIR:AT3G53400.1); similar to conserved hypothetical protein [Medicago truncatula] (GB:ABD32814.1); contains domain no description (G3D.3.40.50.150); contains domain S-adenosyl-L-methionine-dependent      | Unclassified |
| GmaAffx.19785.1.A1_at | 0.00320597  | 3.27577 | BU547380 | NA                                                                      | 0                       | 0                                                                                                                                                                                                                                                               | Unclassified |
| GmaAffx.19896.1.S1_at | 0.00063434  | 2.43046 | BE660048 | Nodulin-like protein [Plantago major (Common plantain)]                 | AT3G56620               | integral membrane family protein / nodulin MtN21-related                                                                                                                                                                                                        | Unclassified |
| GmaAffx.21178.1.S1_at | 0.010082    | 2.16061 | AW508670 | Hypothetical protein [Medicago truncatula (Barrel medic)]               | AT3G03130               | similar to unknown protein [Arabidopsis thaliana] (TAIR:AT5G17160.1); similar to hypothetical protein MtrDRAFT AC144806g2v1 [Medicago truncatula] (GB:ABE91887.1)                                                                                               | Unclassified |
| GmaAffx.22178.1.S1_at | 0.00208848  | 2.28312 | CD416292 | T3P18.8 [Arabidopsis thaliana (Mouse-ear cress)]                        | AT1G62520               | similar to unknown protein [Arabidopsis thaliana] (TAIR:AT4G12450.1); similar to hypothetical protein [Oryza sativa (japonica cultivar-group)] (GB:BAD25627.1); contains domain ADP-ribosylation (SSF56399)                                                     | Unclassified |
| GmaAffx.23063.1.S1_at | 0.01636     | 2.63738 | BI470614 | Hypothetical protein [Oryza sativa (japonica cultivar-group)]           | AT1G03055               | similar to unknown protein [Arabidopsis thaliana] (TAIR:AT1G64680.1); similar to hypothetical protein LOC Os11g37650 [Oryza sativa (japonica cultivar-group)] (GB:ABA94460.1)                                                                                   | Unclassified |

|                       |             |         |          |                                                                                            |           |                                                                                                                                                                                                                                                                   |              |
|-----------------------|-------------|---------|----------|--------------------------------------------------------------------------------------------|-----------|-------------------------------------------------------------------------------------------------------------------------------------------------------------------------------------------------------------------------------------------------------------------|--------------|
| GmaAffx.2310.1.A1_at  | 4.16119E-05 | 2.27098 | AI736226 | NA                                                                                         | AT5G26910 | similar to unknown protein [Arabidopsis thaliana] (TAIR:AT3G58650.1); similar to unknown protein [Arabidopsis thaliana] (TAIR:AT3G05750.1); similar to srpA [Streptococcus cristatus] (GB:AAF34780.1); similar to Os03g0831700 [Oryza sativa (japonica cultivar)] | Unclassified |
| GmaAffx.25415.1.S1_at | 0.00125533  | 2.1606  | BE659702 | Hypothetical protein [Arabidopsis thaliana (Mouse-ear cress)]                              | 0         | 0                                                                                                                                                                                                                                                                 | Unclassified |
| GmaAffx.26690.1.S1_at | 0.000117339 | 3.94099 | BE821303 | At2g26695 [Arabidopsis thaliana (Mouse-ear cress)]                                         | 0         | binding                                                                                                                                                                                                                                                           | Unclassified |
| GmaAffx.27632.1.A1_at | 0.000036062 | 2.24236 | BI969421 | T30F21.12 protein [Arabidopsis thaliana (Mouse-ear cress)]                                 | 0         | 0                                                                                                                                                                                                                                                                 | Unclassified |
| GmaAffx.29769.3.S1_at | 0.00668378  | 2.22426 | BM188726 | Zinc finger (C3HC4-type RING finger)-like protein [Oryza sativa (japonica cultivar-group)] | AT5G62460 | zinc finger (C3HC4-type RING finger) family protein                                                                                                                                                                                                               | Unclassified |
| GmaAffx.38544.1.A1_at | 1.64761E-06 | 2.17305 | CD402591 | Hypothetical protein F12B17 70 [Arabidopsis thaliana (Mouse-ear cress)]                    | AT4G31330 | similar to unknown protein [Arabidopsis thaliana] (TAIR:AT5G10580.1); similar to Os09g0494600 [Oryza sativa (japonica cultivar-group)] (GB:NP001063551.1); similar to hypothetical protein [Oryza sativa (japonica cultivar-group)] (GB:BAC55679.1)               | Unclassified |
| GmaAffx.42607.1.A1_at | 0.00722675  | 2.17577 | BU551023 | NA                                                                                         | AT5G24290 | integral membrane family protein                                                                                                                                                                                                                                  | Unclassified |
| GmaAffx.45034.1.S1_at | 0.000756295 | 2.16352 | CD410308 | Hypothetical protein [Medicago truncatula (Barrel medic)]                                  | AT3G18050 | similar to unknown protein [Arabidopsis thaliana] (TAIR:AT4G28100.1); similar to hypothetical protein MtrDRAFT AC139526g8v1 [Medicago truncatula] (GB:ABE80139.1)                                                                                                 | Unclassified |
| GmaAffx.51291.1.S1_at | 0.00269346  | 2.09916 | BQ080608 | Hypothetical protein [Medicago truncatula (Barrel medic)]                                  | 0         | 0                                                                                                                                                                                                                                                                 | Unclassified |
| GmaAffx.53185.1.S1_at | 0.000312053 | 2.1494  | BE609308 | Hypothetical protein [Medicago truncatula (Barrel medic)]                                  | 0         | 0                                                                                                                                                                                                                                                                 | Unclassified |
| GmaAffx.55536.1.S1_at | 0.00136003  | 2.1481  | BM525054 | NA                                                                                         | 0         | 0                                                                                                                                                                                                                                                                 | Unclassified |
| GmaAffx.56381.1.S1_at | 0.00629976  | 2.20735 | BU927066 | NA                                                                                         | AT3G04970 | zinc finger (DHHC type) family protein                                                                                                                                                                                                                            | Unclassified |
| GmaAffx.56804.1.A1_at | 0.0107501   | 4.77222 | CD415337 | NA                                                                                         | AT5G52030 | TraB protein-related                                                                                                                                                                                                                                              | Unclassified |
| GmaAffx.57322.1.S1_at | 0.000446382 | 2.68736 | AW203377 | Arabidopsis conserved protein [Medicago truncatula (Barrel medic)]                         | AT2G17070 | similar to unknown protein [Arabidopsis thaliana] (TAIR:AT2G17080.1); similar to hypothetical protein [Glycine max] (GB:AAK01735.1); contains InterPro domain Protein of unknown function DUF241, plant; (InterPro:IPR004320)                                     | Unclassified |
| GmaAffx.57415.1.S1_at | 0.00165068  | 2.40283 | AW311518 | NA                                                                                         | 0         | 0                                                                                                                                                                                                                                                                 | Unclassified |
| GmaAffx.58952.1.S1_at | 0.000213372 | 3.56699 | BG156156 | Specific tissue protein 2 [Cicer arietinum (Chickpea) (Garbanzo)]                          | 0         | 0                                                                                                                                                                                                                                                                 | Unclassified |
| GmaAffx.61868.1.S1_at | 0.0101727   | 3.12172 | AW101706 | Hypothetical protein [Medicago truncatula (Barrel medic)]                                  | 0         | 0                                                                                                                                                                                                                                                                 | Unclassified |

|                         |             |         |          |                                                                                                 |           |                                                                                                                                                                                                                                                   |              |
|-------------------------|-------------|---------|----------|-------------------------------------------------------------------------------------------------|-----------|---------------------------------------------------------------------------------------------------------------------------------------------------------------------------------------------------------------------------------------------------|--------------|
| GmaAffx.62247.1.S1_at   | 0.00010447  | 2.52488 | BM519738 | Gb AAB82627.1 [Arabidopsis thaliana (Mouse-ear cress)]                                          | AT5G62280 | similar to unknown protein [Arabidopsis thaliana] (TAIR:AT2G45360.1); similar to Os02g0455400 [Oryza sativa (japonica cultivar-group)] (GB:NP 001046773.1); similar to unknown protein [Oryza sativa (japonica cultivar-group)] (GB:BAD19988.1)   | Unclassified |
| GmaAffx.62958.1.S1_at   | 8.65894E-05 | 2.59774 | AW569146 | Sali3-2 [Glycine max (Soybean)]                                                                 | 0         | 0                                                                                                                                                                                                                                                 | Unclassified |
| GmaAffx.65048.1.S1_s_at | 0.00437248  | 2.23326 | BQ628412 | NA                                                                                              | 0         | 0                                                                                                                                                                                                                                                 | Unclassified |
| GmaAffx.65462.1.S1_at   | 0.00157749  | 2.90984 | BU765323 | Pentatricopeptide (PPR) repeat-containing protein-like [Oryza sativa (japonica cultivar-group)] | AT3G02650 | pentatricopeptide (PPR) repeat-containing protein                                                                                                                                                                                                 | Unclassified |
| GmaAffx.65596.1.S1_at   | 1.01746E-05 | 3.26336 | AW459469 | NA                                                                                              | AT3G06840 | similar to unknown protein [Arabidopsis thaliana] (TAIR:AT5G49170.1)                                                                                                                                                                              | Unclassified |
| GmaAffx.66676.1.S1_at   | 0.000432861 | 2.02111 | BQ610288 | NA                                                                                              | AT1G75500 | nodulin MtN21 family protein                                                                                                                                                                                                                      | Unclassified |
| GmaAffx.68853.1.S1_at   | 0.000720388 | 2.91373 | CA803108 | Hypothetical protein At1g15260 [Arabidopsis thaliana (Mouse-ear cress)]                         | AT1G15260 | similar to unknown protein [Arabidopsis thaliana] (TAIR:AT3G16070.1)                                                                                                                                                                              | Unclassified |
| GmaAffx.69270.1.S1_at   | 0.000647925 | 4.94687 | BM732932 | Protein At1g51340 [Arabidopsis thaliana (Mouse-ear cress)]                                      | 0         | 0                                                                                                                                                                                                                                                 | Unclassified |
| GmaAffx.69982.1.S1_at   | 0.00547498  | 2.01501 | BG238181 | NA                                                                                              | AT3G48490 | unknown protein                                                                                                                                                                                                                                   | Unclassified |
| GmaAffx.70536.1.A1_at   | 0.00359309  | 2.91591 | CD412979 | NA                                                                                              | AT1G31335 | similar to Os03g0780200 [Oryza sativa (japonica cultivar-group)] (GB:NP 001051448.1)                                                                                                                                                              | Unclassified |
| GmaAffx.72117.1.S1_at   | 0.00255683  | 2.11483 | CA800442 | Hypothetical protein [Medicago truncatula (Barrel medic)]                                       | AT2G38320 | similar to unknown protein [Arabidopsis thaliana] (TAIR:AT5G01620.2); similar to expressed protein [Oryza sativa (japonica cultivar-group)] (GB:ABF95402.1); similar to Os03g0817500 [Oryza sativa (japonica cultivar-group)] (GB:NP 001051701.1) | Unclassified |
| GmaAffx.73732.1.S1_at   | 0.0132212   | 3.77585 | BM954799 | Hypothetical protein [Medicago truncatula (Barrel medic)]                                       | AT3G56620 | integral membrane family protein / nodulin MtN21-related                                                                                                                                                                                          | Unclassified |
| GmaAffx.76135.1.S1_at   | 0.00123951  | 2.07494 | BE329894 | Hypothetical protein [Medicago truncatula (Barrel medic)]                                       | AT4G39840 | similar to hypothetical protein MtrDRAFT AC125389g23v2 [Medicago truncatula] (GB:ABE94089.1)                                                                                                                                                      | Unclassified |
| GmaAffx.76251.1.S1_at   | 0.00540915  | 2.44184 | AW704352 | Hypothetical protein [Arabidopsis thaliana (Mouse-ear cress)]                                   | AT4G15830 | binding                                                                                                                                                                                                                                           | Unclassified |
| GmaAffx.78119.1.S1_at   | 0.00243471  | 2.22616 | BE803157 | Hypothetical protein At5g49170 [Arabidopsis thaliana (Mouse-ear cress)]                         | AT5G49170 | similar to unknown protein [Arabidopsis thaliana] (TAIR:AT3G06840.1)                                                                                                                                                                              | Unclassified |
| GmaAffx.78194.1.S1_at   | 0.000349234 | 2.64764 | BE440278 | Hypothetical protein At3g44150 [Arabidopsis thaliana (Mouse-ear cress)]                         | 0         | 0                                                                                                                                                                                                                                                 | Unclassified |
| GmaAffx.80180.1.A1_at   | 0.00325774  | 2.59188 | AW349390 | Protein kinase; EPSP synthase [Medicago truncatula (Barrel medic)]                              | 0         | 0                                                                                                                                                                                                                                                 | Unclassified |

|                      |             |         |          |                                                                         |           |                                                                                                                                                                                                                                                                  |              |
|----------------------|-------------|---------|----------|-------------------------------------------------------------------------|-----------|------------------------------------------------------------------------------------------------------------------------------------------------------------------------------------------------------------------------------------------------------------------|--------------|
| GmaAfx.80731.1.S1_at | 0.00457366  | 2.3314  | BE475096 | Gb AAD22996.1 [Arabidopsis thaliana (Mouse-ear cross)]                  | AT2G30900 | similar to unknown protein [Arabidopsis thaliana] (TAIR:AT1G78710.1); similar to unknown protein [Arabidopsis thaliana] (TAIR:AT2G42570.1); similar to unknown [Pisum sativum] (GB:ABA29158.1); similar to Os01g0652100 [Oryza sativa (japonica cultivar-group)] | Unclassified |
| GmaAfx.80810.1.S1_at | 0.00477898  | 2.31882 | BE346738 | T21P5.16 protein [Arabidopsis thaliana (Mouse-ear cross)]               | AT3G03420 | Ku70-binding family protein                                                                                                                                                                                                                                      | Unclassified |
| GmaAfx.80917.1.A1_at | 0.0113643   | 2.65723 | BE583981 | NA                                                                      | AT5G32440 | similar to unknown protein [Arabidopsis thaliana] (TAIR:AT1G80040.1); similar to Os06g0642900 [Oryza sativa (japonica cultivar-group)] (GB:NP 001058174.1); similar to Ubiquitin system component Cue; UBA-like [Medicago truncatula] (GB:ABE77893.1)            | Unclassified |
| GmaAfx.80959.1.S1_at | 2.30222E-05 | 2.03043 | AW349777 | Gb AAF34826.1 [Arabidopsis thaliana (Mouse-ear cross)]                  | AT3G12870 | similar to unknown protein [Arabidopsis thaliana] (TAIR:AT5G56120.1); similar to hypothetical protein [Oryza sativa (japonica cultivar-group)] (GB:AAK09219.1); similar to Os03g0778400 [Oryza sativa (japonica cultivar-group)] (GB:NP 001051445.1)             | Unclassified |
| GmaAfx.81156.1.S1_at | 0.000164    | 2.10227 | CA819098 | Zinc finger, BED-type predicted [Medicago truncatula (Barrel medic)]    | no_match  | no match                                                                                                                                                                                                                                                         | Unclassified |
| GmaAfx.82408.1.A1_at | 0.000881533 | 2.17588 | BI971488 | F12A21.9 [Arabidopsis thaliana (Mouse-ear cross)]                       | AT5G38690 | similar to unknown protein [Arabidopsis thaliana] (TAIR:AT1G67780.1); similar to PREDICTED: hypothetical protein [Strongylocentrotus purpuratus] (GB:XP 001188312.1); similar to PREDICTED: hypothetical protein, partial [Strongylocentrotus purpuratus]        | Unclassified |
| GmaAfx.82795.1.S1_at | 0.0151364   | 3.11145 | CD487797 | Hypothetical protein [Arabidopsis thaliana (Mouse-ear cross)]           | AT5G18460 | similar to unknown protein [Arabidopsis thaliana] (TAIR:AT1G23340.2); similar to Protein of unknown function DUF239, plant [Medicago truncatula] (GB:ABE82132.1); contains InterPro domain Protein of unknown function DUF239, plant; (InterPro:IPR004314)       | Unclassified |
| GmaAfx.82900.1.S1_at | 0.00306892  | 2.37492 | BM884903 | NA                                                                      | 0         | 0                                                                                                                                                                                                                                                                | Unclassified |
| GmaAfx.83805.1.S1_at | 0.00118599  | 2.40369 | CA800952 | NA                                                                      | AT3G42725 | unknown protein                                                                                                                                                                                                                                                  | Unclassified |
| GmaAfx.84421.1.A1_at | 0.00428394  | 2.62284 | AI965725 | NA                                                                      | AT3G09280 | unknown protein                                                                                                                                                                                                                                                  | Unclassified |
| GmaAfx.85434.1.S1_at | 0.000622191 | 3.01446 | BG882734 | Hypothetical protein [Medicago truncatula (Barrel medic)]               | AT4G21780 | similar to hypothetical protein MtrDRAFT AC152499g5v1 [Medicago truncatula] (GB:ABE77785.1)                                                                                                                                                                      | Unclassified |
| GmaAfx.93519.1.S1_at | 0.00353498  | 2.33998 | CF809244 | Hypothetical protein At4g15970 [Arabidopsis thaliana (Mouse-ear cross)] | 0         | 0                                                                                                                                                                                                                                                                | Unclassified |

|                      |             |         |          |                                                                                        |   |       |              |
|----------------------|-------------|---------|----------|----------------------------------------------------------------------------------------|---|-------|--------------|
| GmaAffx.9529.1.S1_at | 0.00438662  | 2.34428 | BI971547 | Hypothetical protein [Medicago truncatula (Barrel medic)]                              | 0 | 0     | Unclassified |
| GmaAffx.9539.1.S1_at | 2.77678E-07 | 2.19616 | BI972166 | Putative fasciclin-like arabinogalactan protein FLA2 [Trifolium pratense (Red clover)] | 0 | 0     | Unclassified |
| GmaAffx.981.1.S1_at  | 0.0130711   | 6.1259  | BG239687 | NA                                                                                     | 0 | 0     | Unclassified |
| GmaAffx.9844.1.S1_at | 0.00006235  | 2.13669 | BM522926 | Hypothetical protein upa9 [Capsicum annuum (Bell pepper)]                              | 0 | AGP41 | Unclassified |
